# Supplementary material for: The clinical drug candidate anle138b binds predominantly to the central cavity in lipidic Aβ₄₀ fibrils and modulates fibril formation.
Source: Research Square preprint supplement (doi:10.21203/rs.3.rs-6770178/v1), 2025-06-06
Supplement: Supplementary file 1 [file 5073195274df374f3d4ddefb.pdf]

**Supplemental Information**

**The clinical drug candidate anle138b binds predominantly to the central cavity in lipidic A $\beta$ <sub>40</sub> fibrils and modulates fibril formation.**

Mookyoung Han<sup>1</sup>, Benedikt Frieg<sup>2</sup>, Dirk Matthes<sup>3</sup>, Andrei Leonov<sup>1,4</sup>, Sergey Ryazanov<sup>1,4</sup>, Karin Giller<sup>1</sup>, Evgeny Nimerovsky<sup>1</sup>, Marianna Stampolaki<sup>1</sup>, Kai Xue<sup>1</sup>, Kerstin Overkamp<sup>1</sup>, Christian Dienemann<sup>5</sup>, Dietmar Riedel<sup>6</sup>, Armin Giese<sup>4</sup>, Stefan Becker<sup>1</sup>, Bert L. de Groot<sup>3</sup>, Gunnar F. Schröder<sup>2,7</sup>, Loren B. Andreas<sup>1\*</sup> and Christian Griesinger<sup>1,8\*</sup>

<sup>1</sup>. Department of NMR-Based Structural Biology, Max Planck Institute for Multidisciplinary Sciences; Göttingen, Germany.

<sup>2</sup> Ernst-Ruska Centre for Microscopy and Spectroscopy with Electrons, ER-C-3 Structural Biology, Forschungszentrum Jülich, Jülich, Germany

<sup>3</sup>. Department of Theoretical and Computational Biophysics, Max Planck Institute for Multidisciplinary Sciences; Göttingen, Germany.

<sup>4</sup>. MODAG GmbH, Mikroforum Ring 3, 55234, Wendelsheim, Germany

<sup>5</sup>. Department of Molecular Biology, Max Planck Institute for Multidisciplinary Sciences; Göttingen, Germany.

<sup>6</sup>. Laboratory of Electron Microscopy, Max-Planck-Institute for Multidisciplinary Sciences, Göttingen, Germany.

<sup>7</sup>. Physics Department, Heinrich Heine University Düsseldorf; Düsseldorf, Germany

<sup>8</sup>. Cluster of Excellence "Multiscale Bioimaging: From Molecular Machines to Networks of Excitable Cells" (MBExC), University of Göttingen; Göttingen, Germany.

\* Correspondence and requests for materials should be addressed to Loren B. Andreas (land@mpinat.mpg.de) and Christian Griesinger (cigr@mpinat.mpg.de).

**a**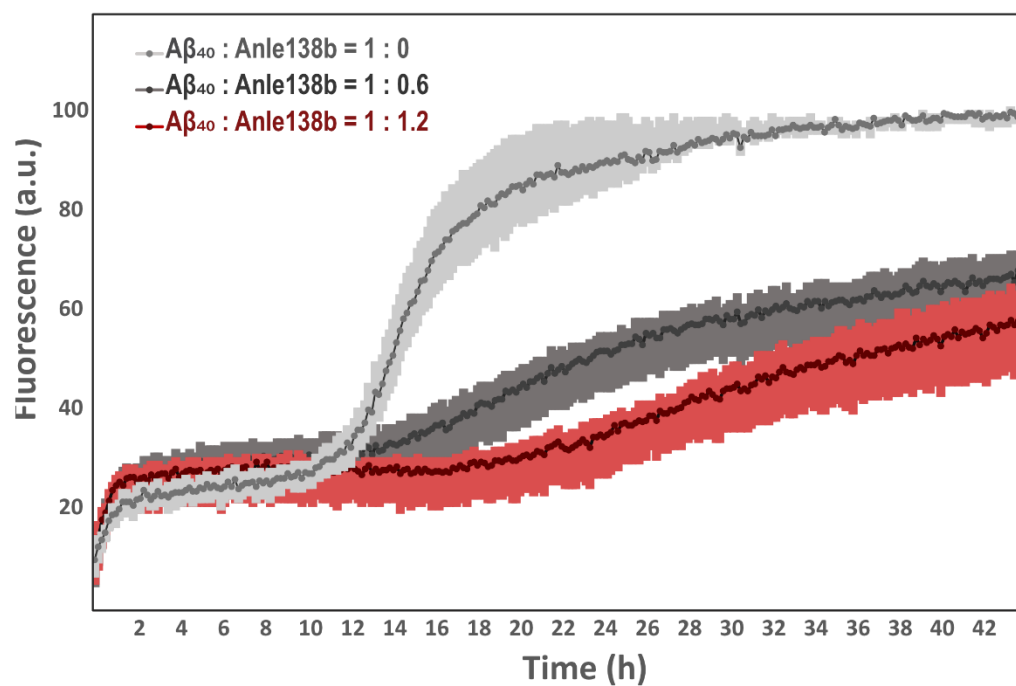**b**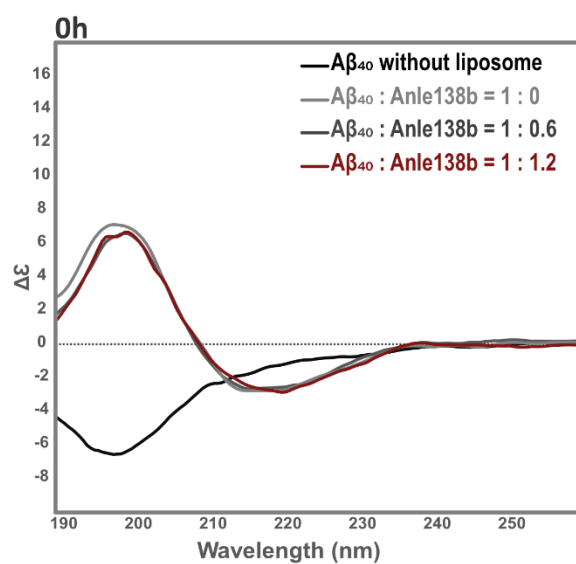**c**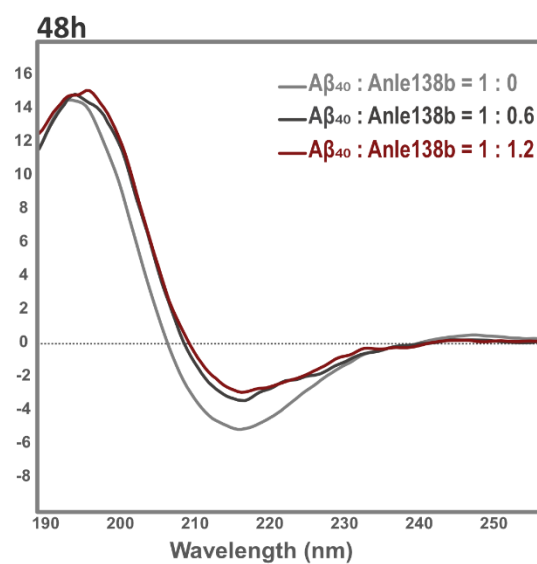

**Supplementary Figure 1 | Anle138b modulates L1 A $\beta_{40}$  fibril formation and secondary structure under the pre-treatment condition.**

**a.** The ThT fluorescence assay shows the effect of increasing concentrations of anle138b on A $\beta_{40}$  fibril formation. The control fibrils (A $\beta_{40}$ : anle138b [SMPR] = 1:0) are shown in light gray, the intermediate concentration (SMPR = 1:0.6) in dark gray, and the high concentration (SMPR = 1:1.2) in red. At the highest concentration, anle138b extends the lag phase by approximately 8–10 hours and reduces the overall ThT fluorescence intensity by 40–60%. **b.** Circular dichroism (CD) spectra acquired at 0 hours show  $\beta$ -sheet formation in all conditions (SMPR = 1:0, 1:0.6, and 1:1.2; light gray, dark gray, red). No significant differences were observed between the formation of the  $\beta$ -sheet in the presence or absence of anle138b. **c.** CD spectra after 48 hours of incubation reveal strong  $\beta$ -sheet content in the control fibrils (light gray), while fibrils treated with anle138b (dark gray for SMPR = 1:0.6, red for SMPR = 1:1.2) exhibit reduced  $\beta$ -sheet formation.

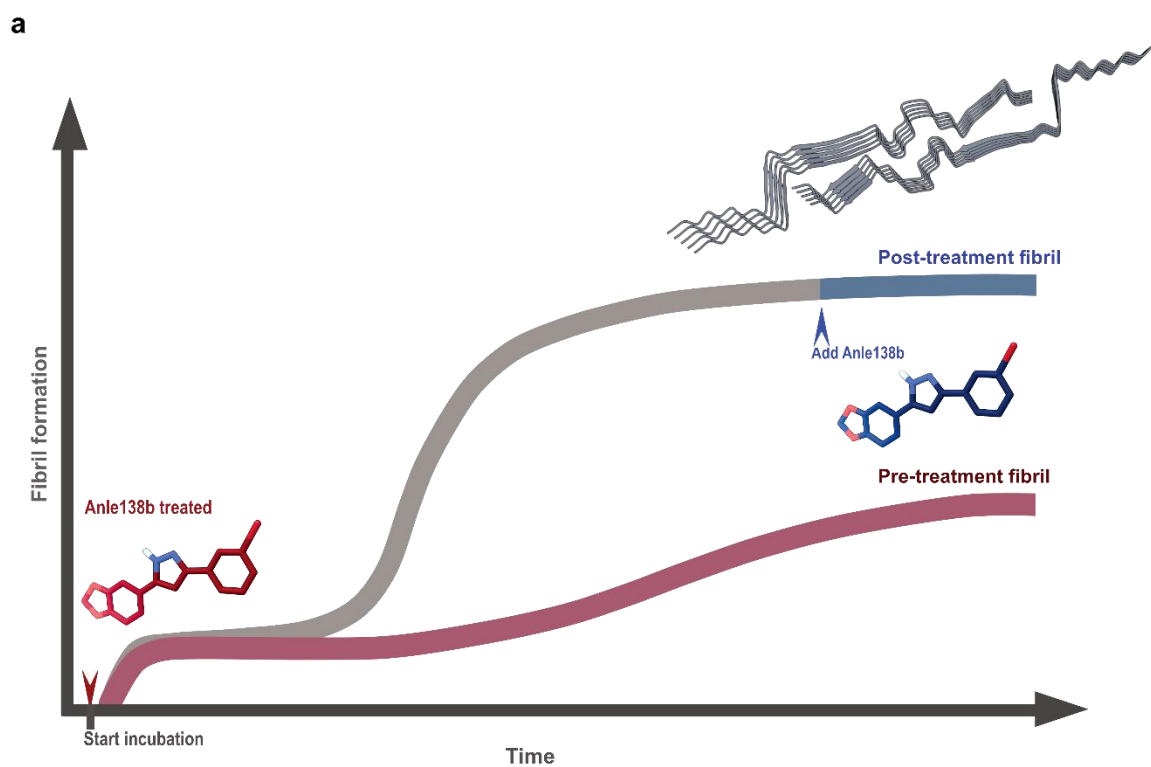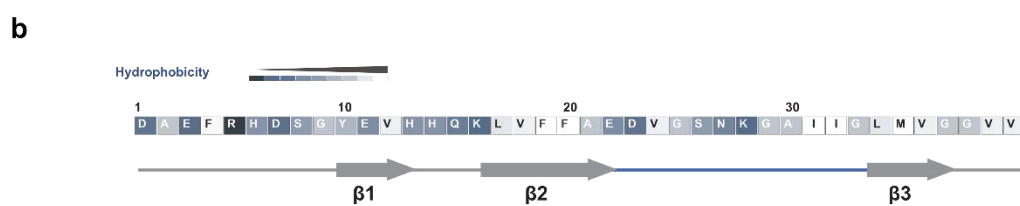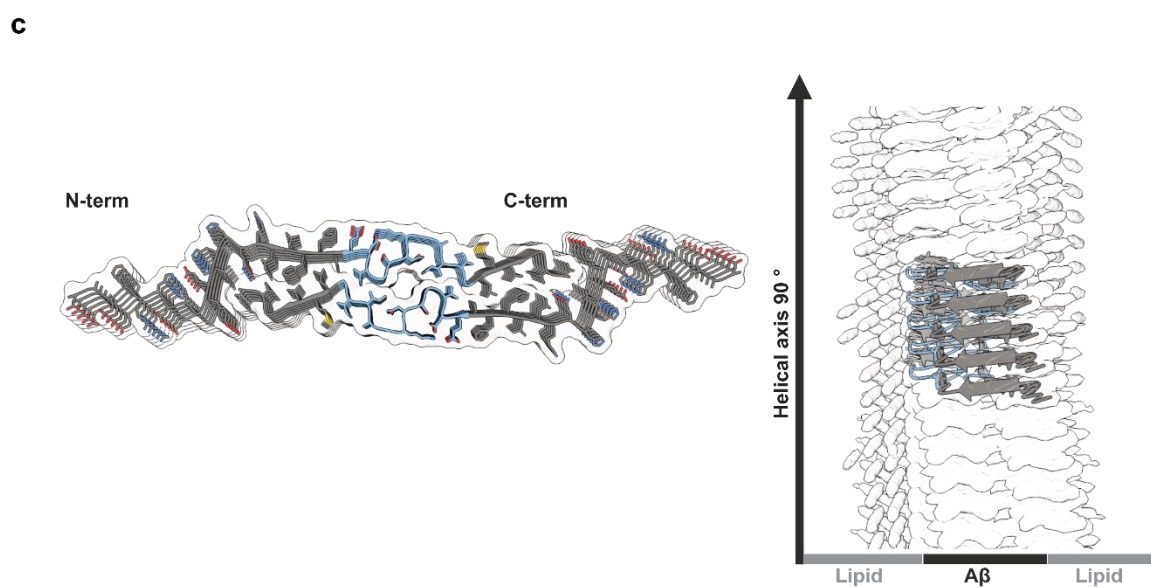

**Supplementary Figure 2 | Schematic illustration of experiments investigating the binding sites of anle138b on L1 A $\beta$ <sub>40</sub> fibrils.**

**a.** Schematic illustration of L1 A $\beta$ <sub>40</sub> fibril formation under pre-treatment and post-treatment conditions. In the post-treatment condition, anle138b (blue) is added after fibril formation. In the pre-treatment condition, fibrils form in the presence of anle138b (red), which extends the lag phase and reduces the final fibril amount. The two arrows indicate the time points at which anle138b was administered during the fibril formation process. Blue represents the post-treatment condition, and red represents the pre-treatment condition. **b.** Amino acid sequence and secondary structure of the L1 A $\beta$ <sub>40</sub> fibril. Hydrophobicity is color-coded using a gradient from dark blue (hydrophilic) to white (hydrophobic), based on the Eisenberg scale<sup>65</sup>. The loop region (Ala21–Gly33), highlighted in blue, contributes to the formation of the central cavity between the two protofilaments. **c.** Structure of the L1 A $\beta$ <sub>40</sub> fibril based on cryo-EM data. Left: Top view of the fibril showing the loop region (blue). Right: Side view highlighting the periodic alignment of rod-shaped lipid densities along the fibril axis, as visualized in the cryo-EM map.

**a**

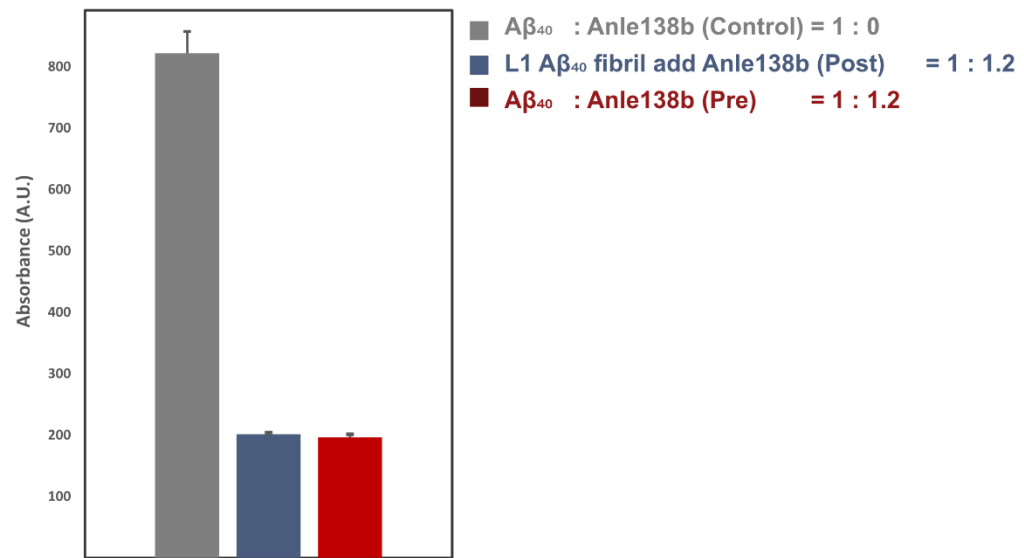

**b**

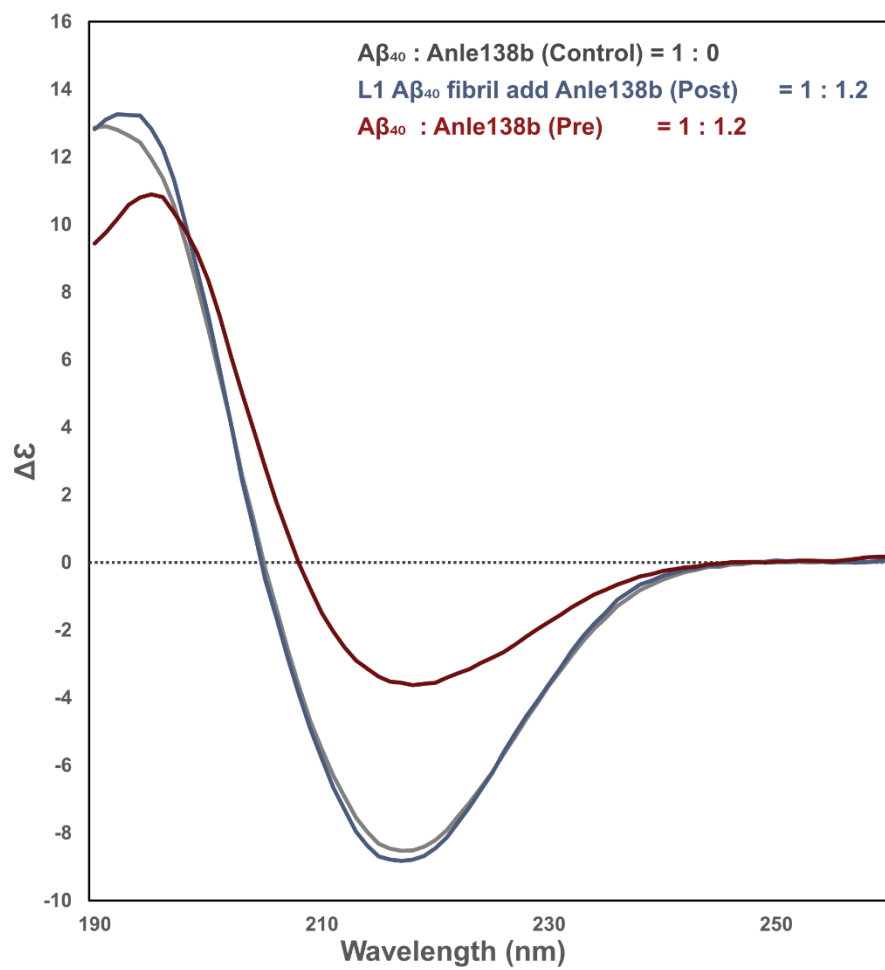

**Supplementary Figure 3 | Effects of anle138b on L1 A $\beta$ <sub>40</sub> fibril formation and structural interaction.**

The results shown here were obtained from the same sample sets used for cryo-EM (Fig. 2) as well as in negative-stain EM, 1D (<sup>1</sup>H) <sup>15</sup>N CP NMR experiments (Fig. 1b, c), 2D <sup>13</sup>C<sup>13</sup>C-DARR spectra (Supplementary Figs. 15, 16), and 2D (H)NCA spectra (Supplementary Fig 5). **a.** ThT fluorescence assay of L1 A $\beta$ <sub>40</sub> fibrils prepared under three different conditions. The control sample contains (gray) in the absence of anle138b. In the post-treatment condition (blue; SMPR = 1:1.2) and in the pre-treatment condition (red; SMPR = 1:1.2). **b.** CD spectra of L1 A $\beta$ <sub>40</sub> fibrils under the same conditions as in **a**. The control (gray) shows characteristic  $\beta$ -sheet content. The post-treatment condition (blue) exhibits a spectrum similar to the control, indicating that the  $\beta$ -sheet structure is largely preserved. In contrast, the pre-treatment condition (red), where anle138b was present during fibril formation, shows less  $\beta$ -sheet content.

**a**

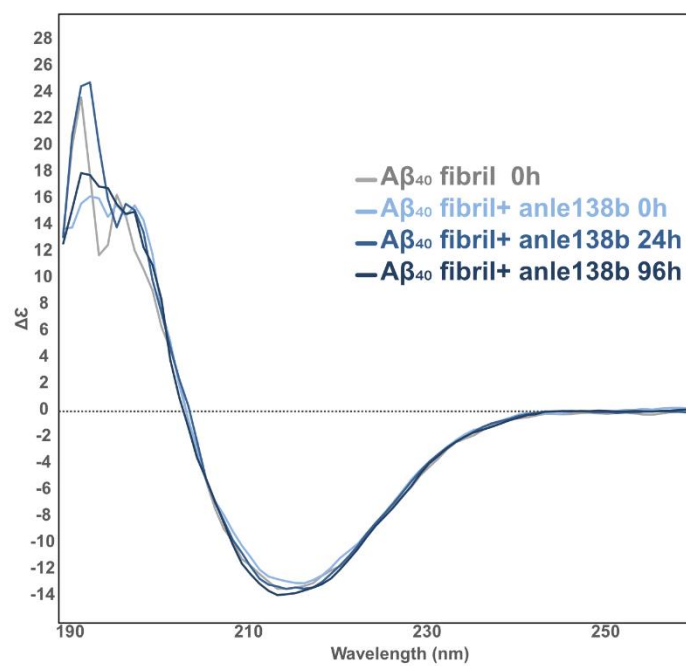

**b**

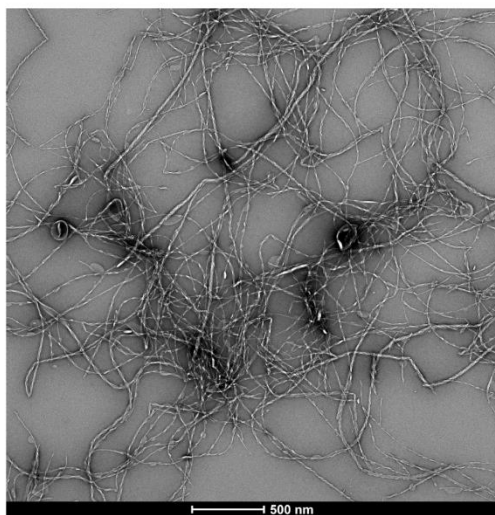

**c**

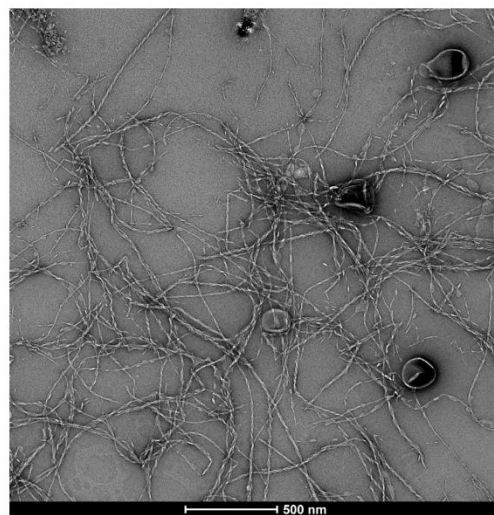



**Supplementary Figure 4 | CD spectroscopy and negative-stain EM analysis of L1 A $\beta$ <sub>40</sub> fibrils under post-treatment condition (SMPR = 1:1.2).**

The secondary structure of L1 A $\beta$ <sub>40</sub> fibrils treated with anle138b was assessed by CD spectroscopy under post-treatment conditions, following incubation at 37 °C for up to 96 hours.

**a.** CD spectra of L1 A $\beta$ <sub>40</sub> fibrils at various time points after anle138b addition: untreated (gray, 0 h), immediately after treatment (light blue, 0 h), 24 h (blue), and 96 h (dark blue). **b, c.**

Negative-stain EM images of L1 A $\beta$ <sub>40</sub> fibrils at 0 h and 96 h after anle138b treatment.

**a**

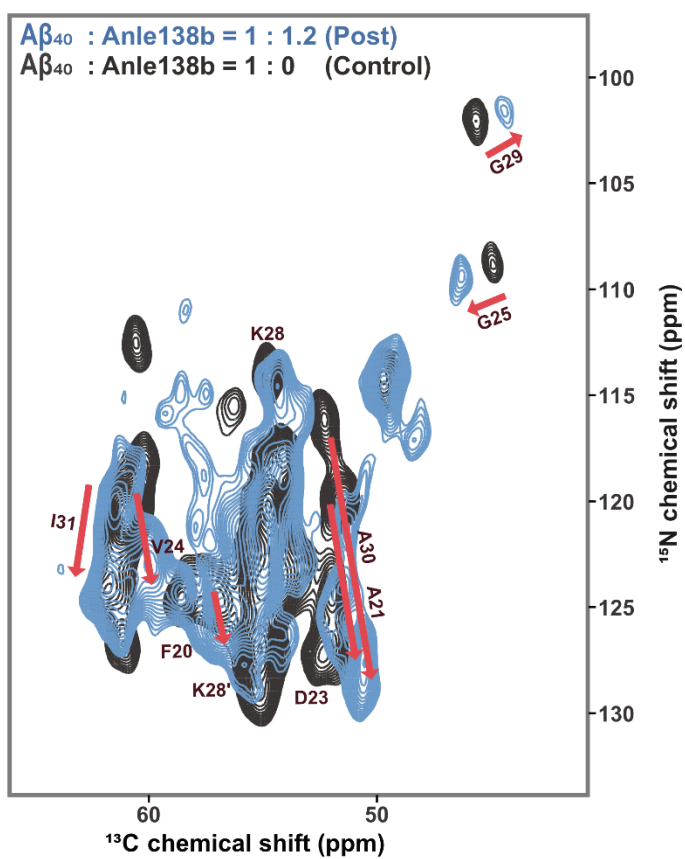

**b**

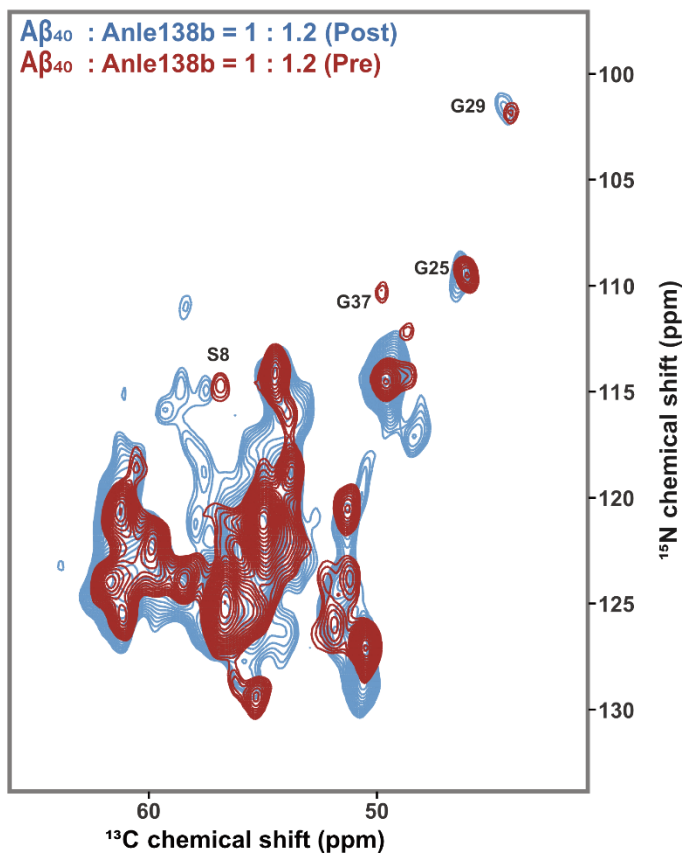

**Supplementary Figure 5 | Superimposed 2D (H)NCA spectra of L1 A $\beta$ <sub>40</sub> fibrils under control, pre-treatment, and post-treatment conditions.**

The spectra were obtained from the same sample sets utilized in cryo-EM (Fig. 2, Supplementary Figs. 6, 7), negative-stain EM, and solid-state NMR experiments (Fig. 1b, c, Supplementary Figs. 15, 16). **a.** Superimposed 2D (H)NCA spectra of L1 A $\beta$ <sub>40</sub> fibrils. The blue spectrum represents fibrils treated with anle138b after fibril formation (post-treatment condition; A $\beta$ <sub>40</sub>: anle138b [SMPR] = 1:1.2, ns = 64), while the black spectrum corresponds to fibrils formed in the absence of anle138b (control condition; ns = 64). Chemical shift perturbations induced by anle138b treatment are indicated by pink arrows. **b.** Superimposed 2D (H)NCA spectra comparing the pre- and post-treatment conditions. The red spectrum represents fibrils formed in the presence of anle138b during aggregation (pre-treatment; SMPR = 1:1.2, ns = 192), while the blue spectrum corresponds to the post-treatment condition (SMPR = 1:1.2, ns = 64).

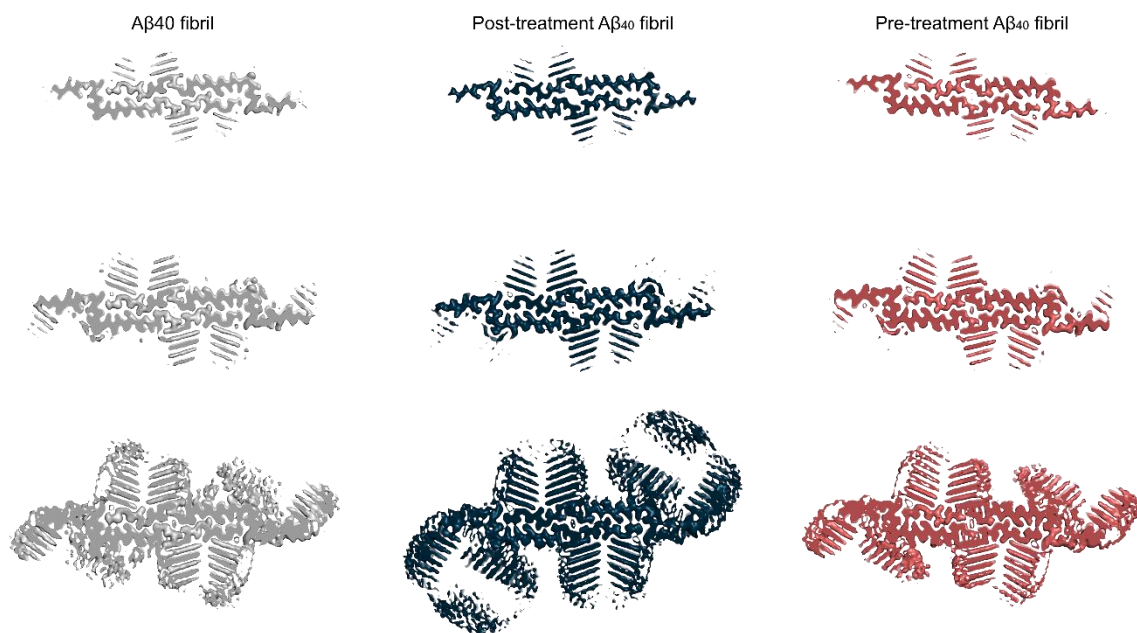

95

96 **Supplementary Figure 6 | Sharpened high-resolution maps at different iso-surface levels,**  
 97 **L1 Aβ<sub>40</sub> fibrils.**

98 From the top to the bottom, the iso-surface level threshold decreases such that additional low-  
 99 resolution features become visible.

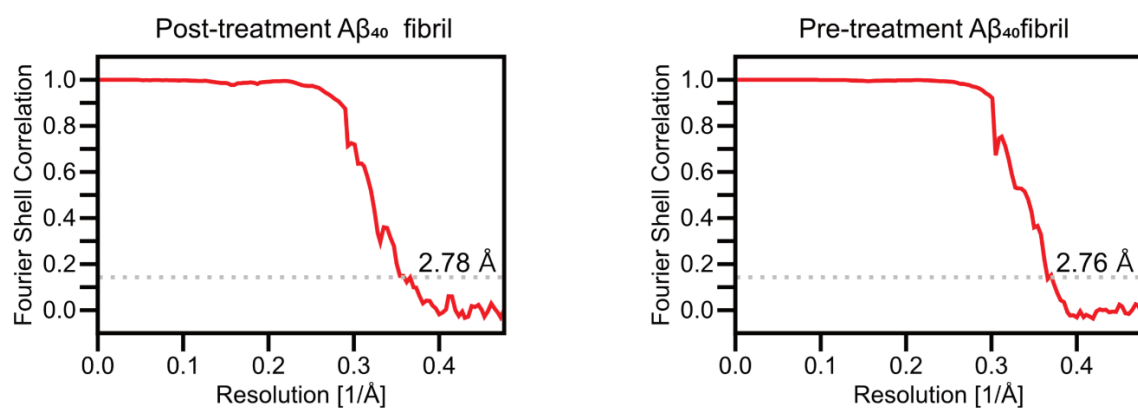

100

101 **Supplementary Figure 7 | Fourier shell correlation curves.**

102 Masked-corrected (z-percentage is 0.1) Fourier shell correlation (FSC) curves. The final  
 103 resolution is shown in the plot and was estimated from the value of the FSC curve for two  
 104 separately refined masked half-maps at 0.143 (red line).

**a**

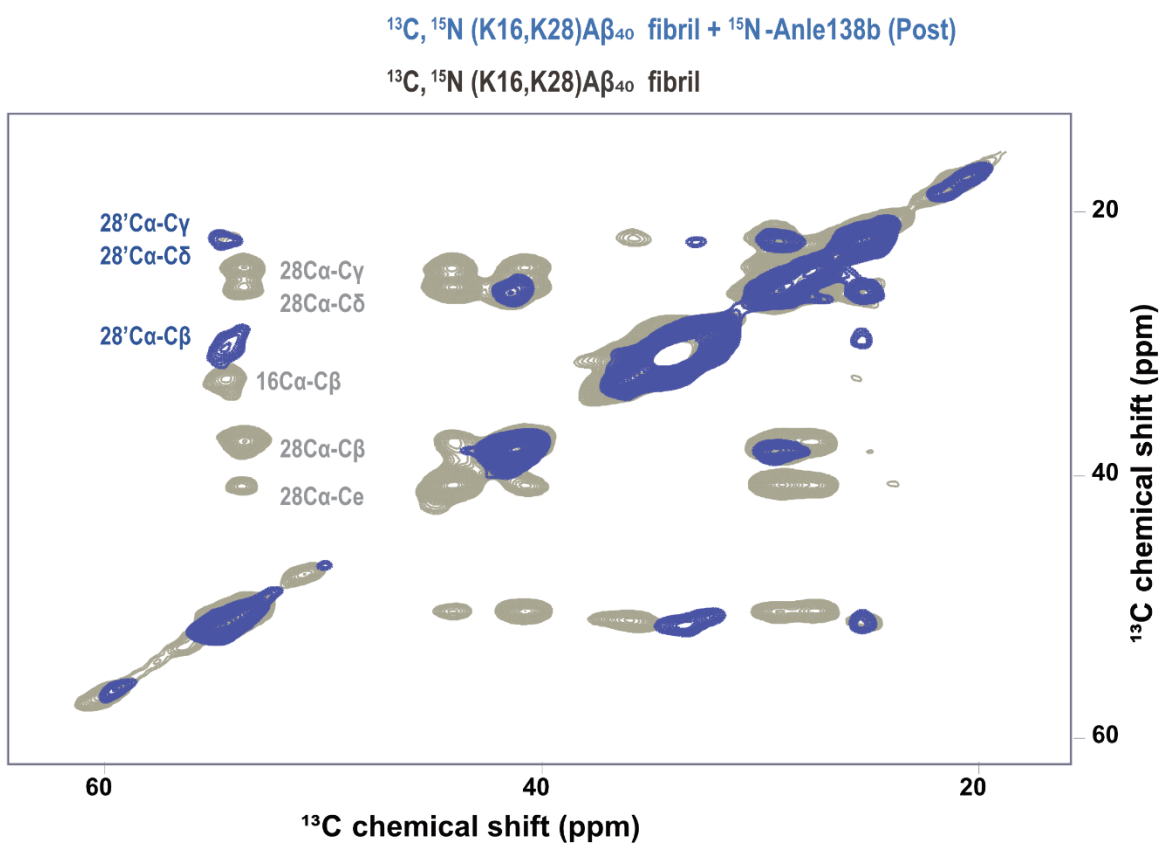

**b**

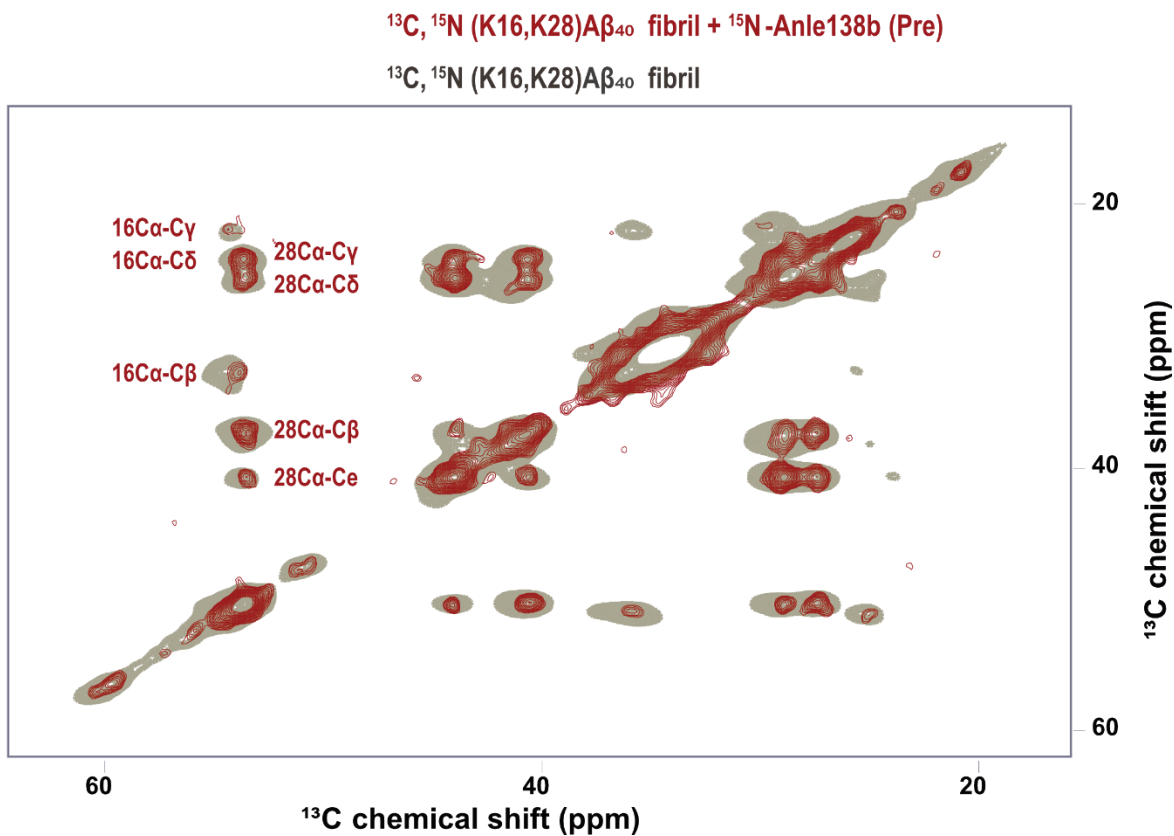

107 **Supplementary Figure 8 | 2D  $^{13}\text{C}^{13}\text{C}$ -DARR spectra of L1 A $\beta_{40}$  fibrils selectively labeled**  
108 **with  $^{13}\text{C}$ ,  $^{15}\text{N}$  at Lys16 and Lys28.**

109 **a.** 2D  $^{13}\text{C}^{13}\text{C}$ -DARR spectrum acquired at 265 K and 850 MHz with a mixing time of 20 ms.  
110 The blue spectrum corresponds to the post-treatment condition. **b.** The red spectrum represents  
111 the pre-treatment condition. In both panels, the gray spectrum represents the control condition.

**a**

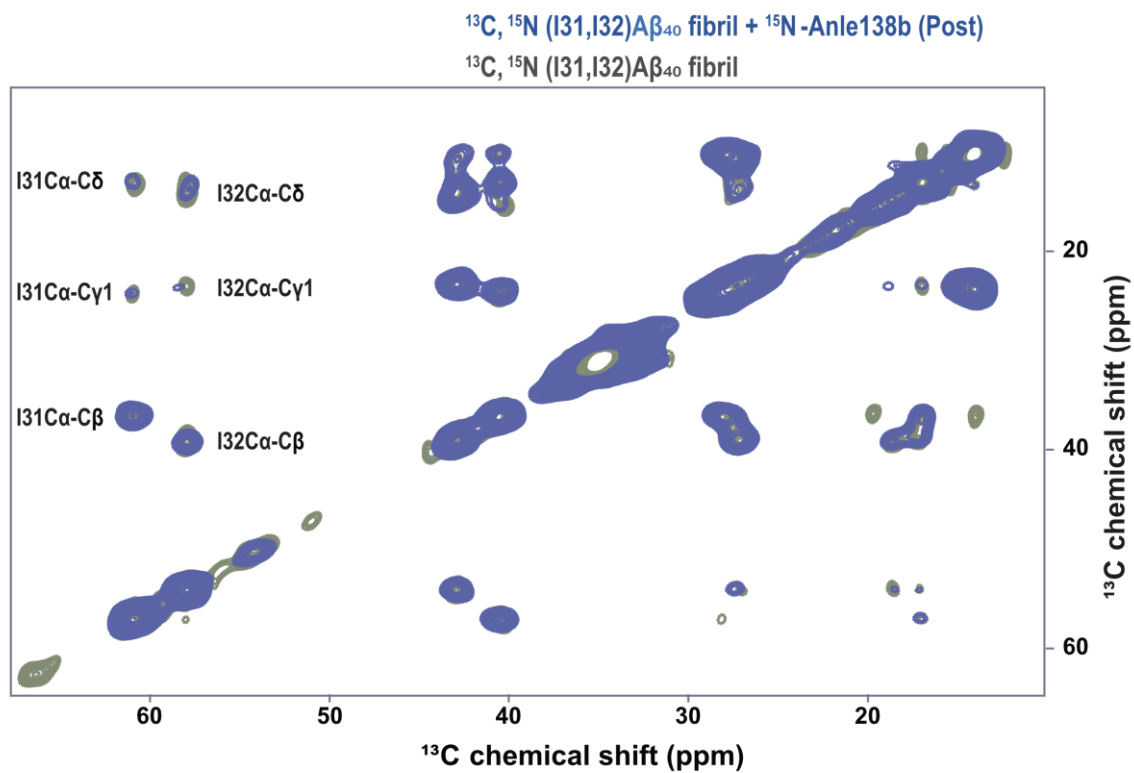

**b**

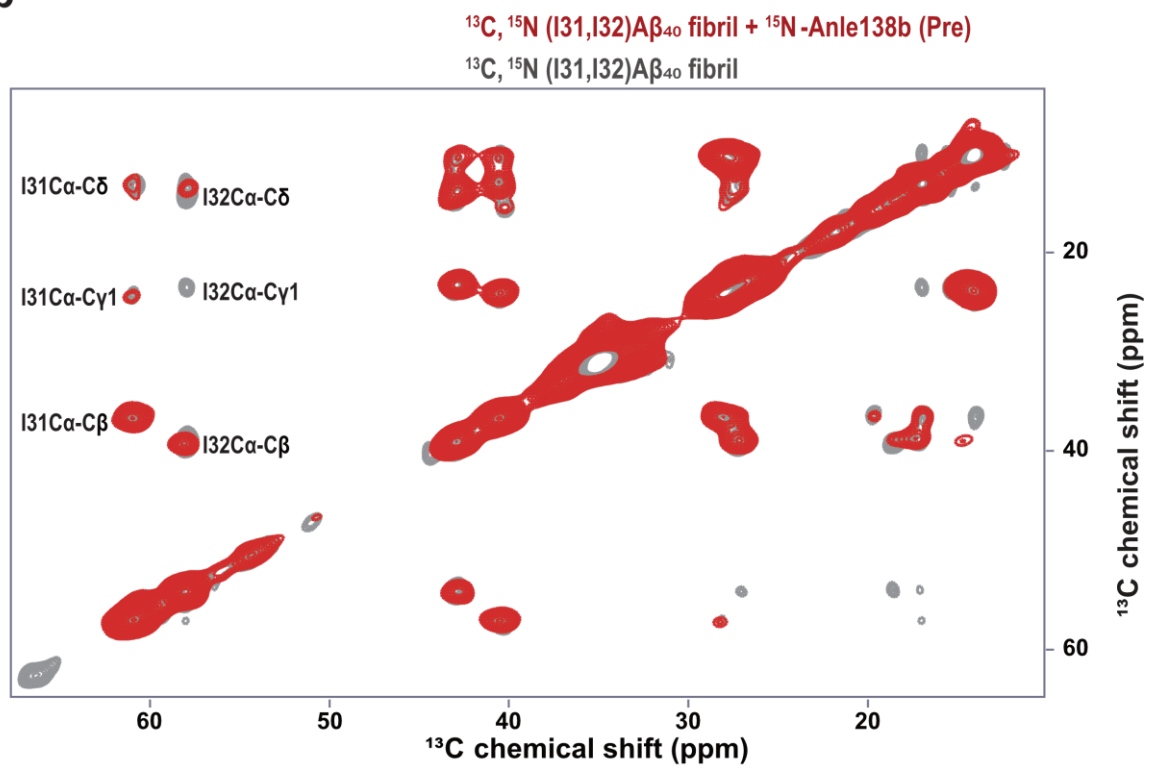



113 **Supplementary Figure 9 | 2D  $^{13}\text{C}^{13}\text{C}$ -DARR spectra of L1 A $\beta_{40}$  fibrils selectively labeled**  
114 **with  $^{13}\text{C}$ ,  $^{15}\text{N}$  at Ile31 and Ile32.**  
115 **a.** 2D  $^{13}\text{C}^{13}\text{C}$ -DARR spectrum acquired at 265 K and 850 MHz with a mixing time of 20 ms.  
116 The blue spectrum corresponds to the post-treatment condition. **b.** The red spectrum represents  
117 the pre-treatment condition. In both panels, the gray spectrum represents the control condition.

**a**

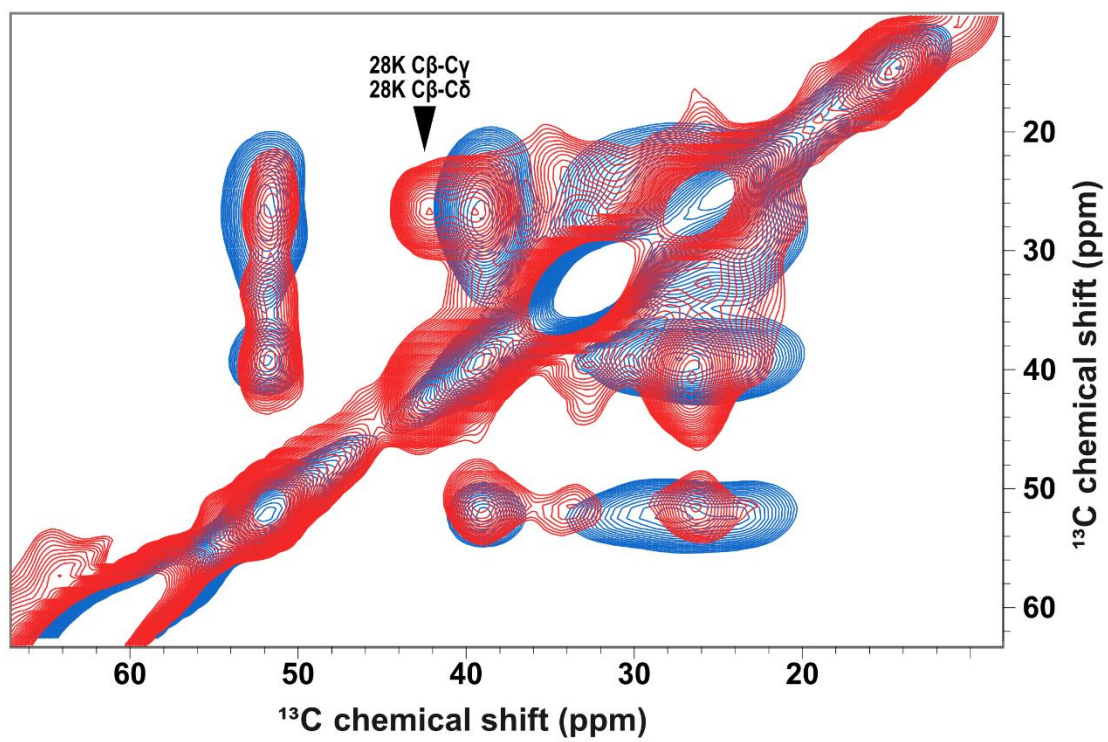

**b**

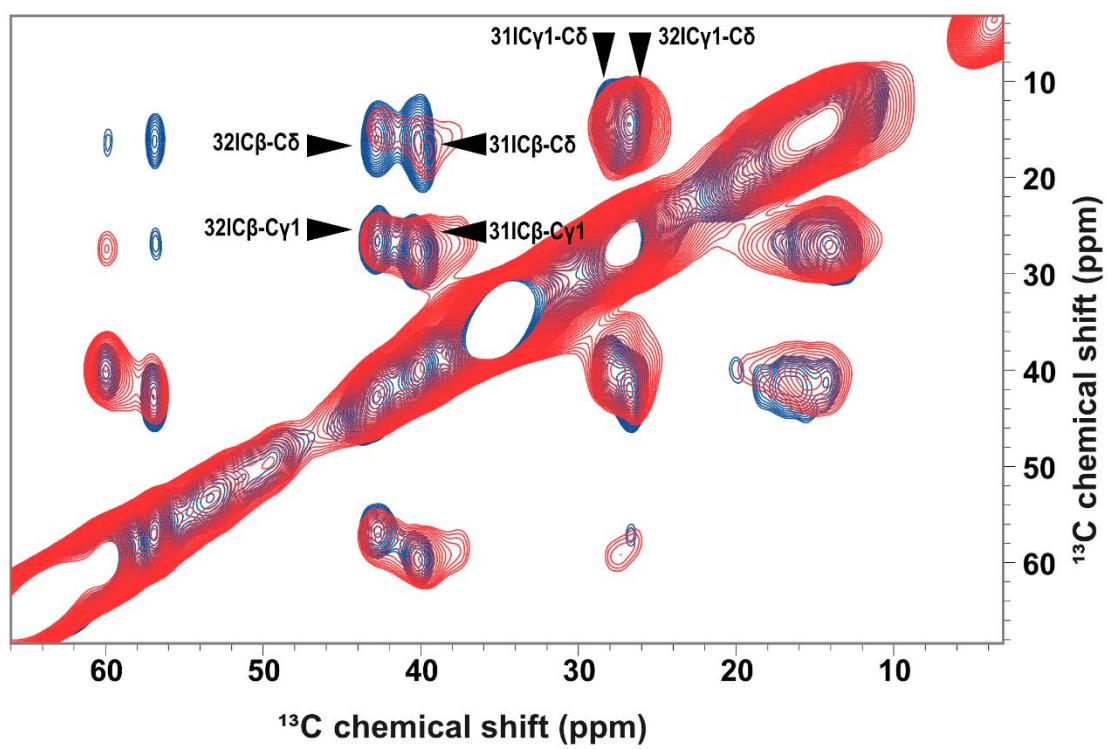

**Supplementary Figure 10 | 2D  $^{13}\text{C}^{13}\text{C}$ - DARR and RFDR spectra of selectively labeled L1 A $\beta_{40}$  fibrils used for DNP experiments.**

**a.** 2D  $^{13}\text{C}^{13}\text{C}$ -DARR spectra acquired at 100 K and 600 MHz with a mixing time of 50 ms under DNP conditions. Fibrils were selectively labeled with  $^{13}\text{C}$ ,  $^{15}\text{N}$  at Lys16 and Lys28. The blue spectrum represents the post-treatment condition, in which anle138b was added after fibril formation. The red spectrum corresponds to the pre-treatment condition, where anle138b was present during fibril formation. **b.** 2D  $^{13}\text{C}^{13}\text{C}$ -RFDR spectra acquired under the same experimental conditions, with a mixing time of 2.6 ms. Fibrils were selectively labeled with  $^{13}\text{C}$ ,  $^{15}\text{N}$  at Ile31 and Ile32. The blue spectrum corresponds to the post-treatment condition, and the red spectrum to the pre-treatment condition. Peak assignments include C $\beta$ -C $\gamma$  and C $\beta$ -C $\delta$  correlations of Lys28 (**a**), and C $\beta$ -C $\gamma$ 1 and C $\gamma$ 1-C $\delta$  correlations of Ile31 and Ile32 (**b**). Arrows indicate assigned peaks.

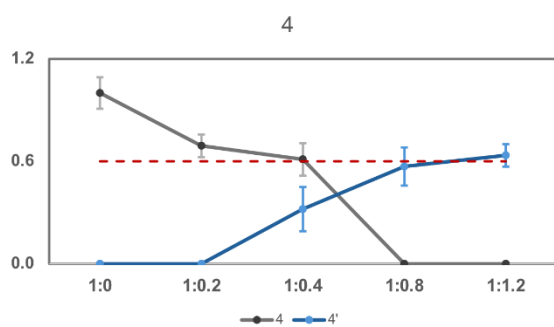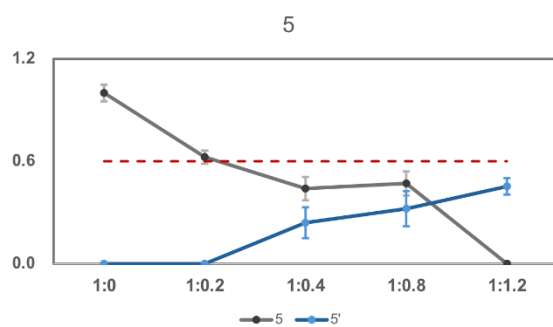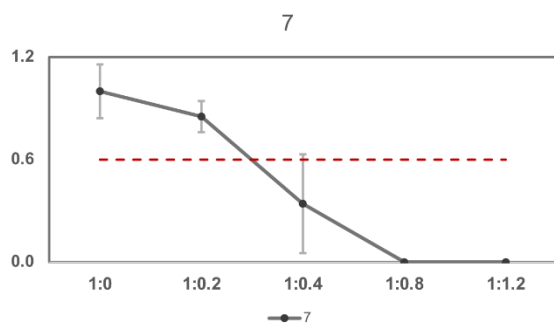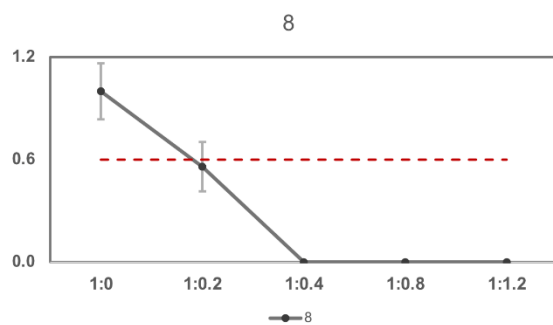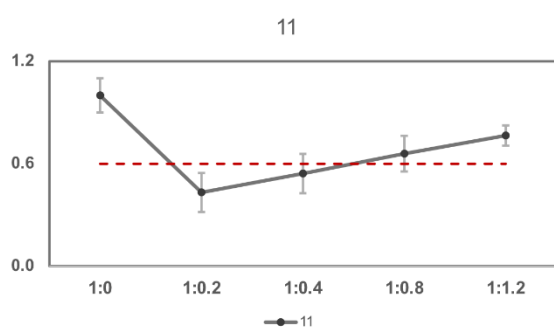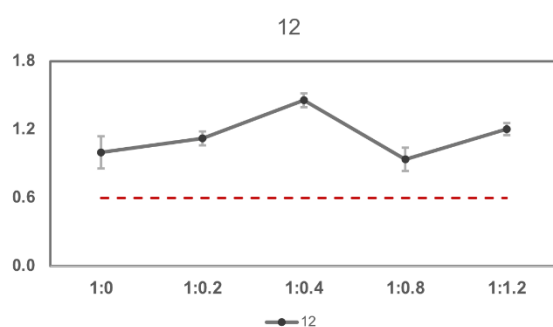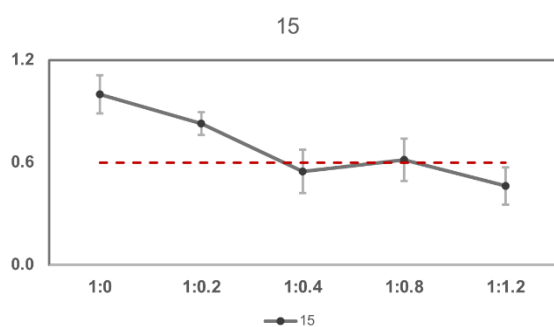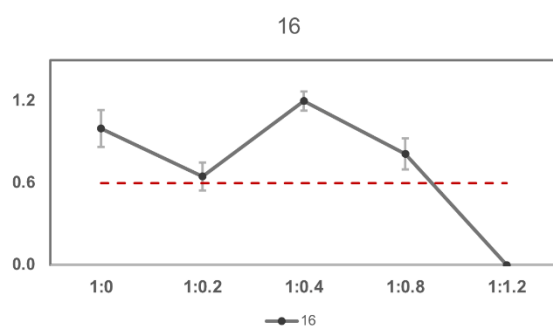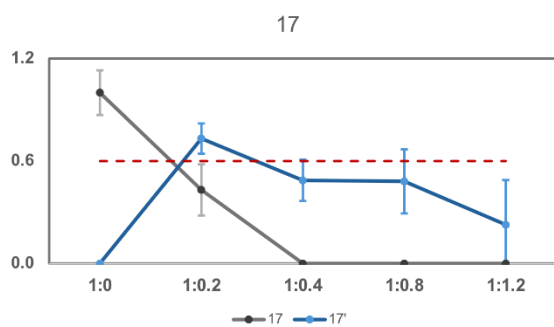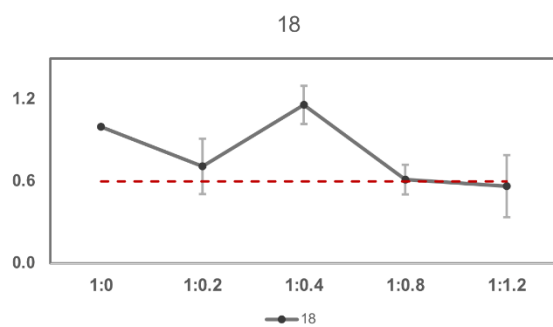

**Supplementary Figure 11 | Titration-dependent intensity changes indicating slow exchange binding of anle138b to residues 4–18 of L1 A $\beta$ <sub>40</sub> fibrils.**

Signal intensity ratios ( $I_{\text{ratio}}$ ) were monitored for selected residues of L1 A $\beta$ <sub>40</sub> as a function of increasing anle138b molar ratios (SMPR 1:0 to 1:1.2) under post-treatment conditions. The gray curves represent normalized intensities of original peaks ( $I_{\text{free}}$ ) observed at SMPR 1:0, and their changes upon ligand titration ( $I_{\text{bound}}$ ). The blue curves indicate new peaks indicative of slow exchange. The dashed red line marks the 0.6 intensity threshold used as a reference for qualitative comparison.  $I_{\text{ratio}} = I_{\text{bound}} / I_{\text{free}}$ , where  $I_{\text{free}}$  refers to the peak intensity in the absence of anle138b, and  $I_{\text{bound}}$  refers to the intensity at each titration point.

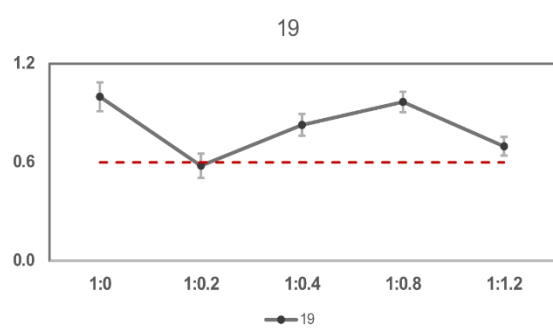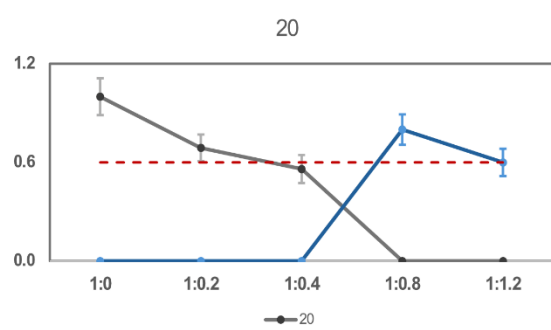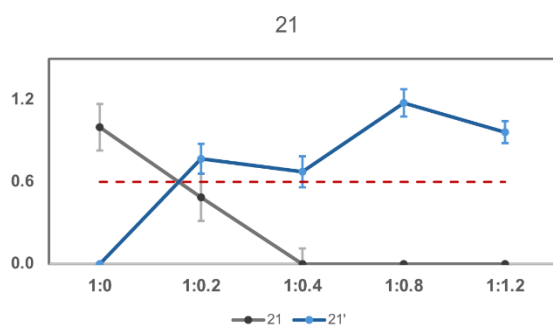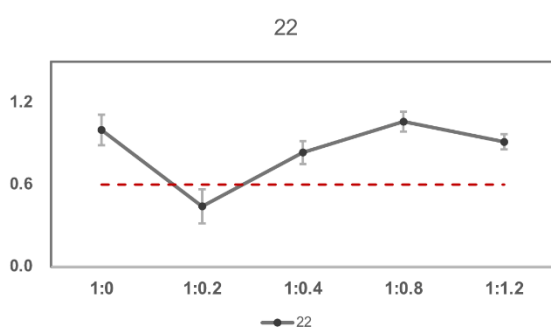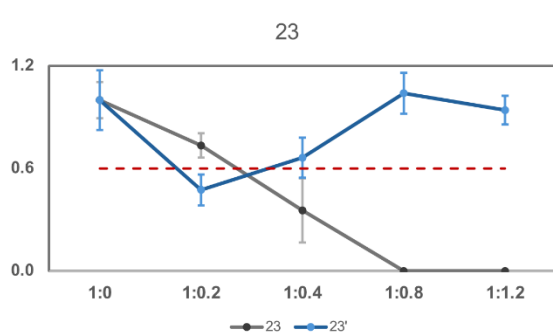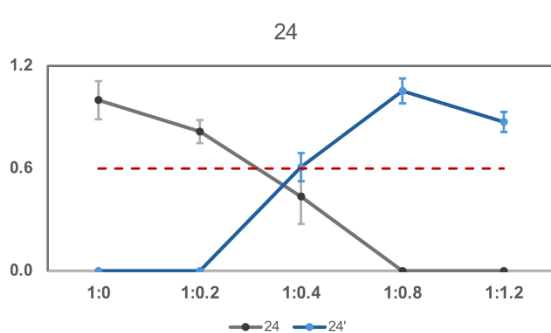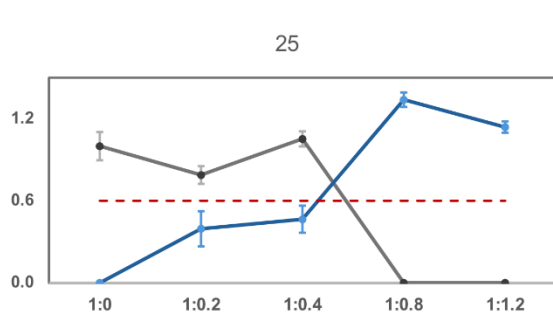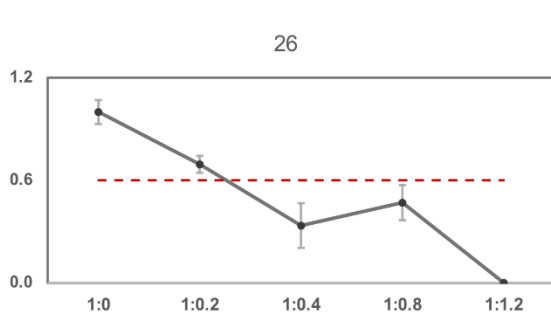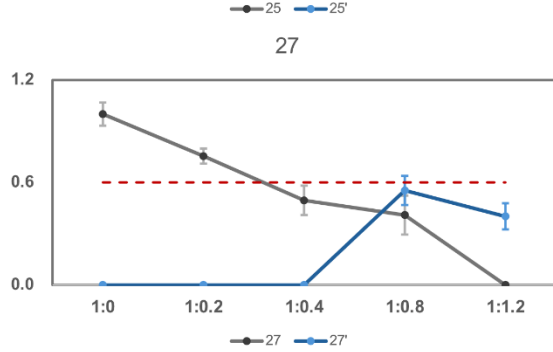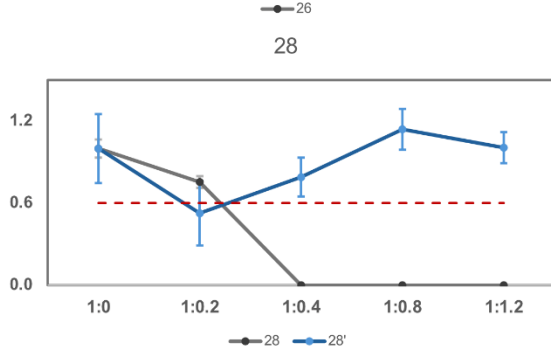

**Supplementary Figure 12 | Titration-dependent intensity changes indicating slow exchange binding of anle138b to residues 19–28 of L1 A $\beta$ <sub>40</sub> fibrils.**

Signal intensity ratios ( $I_{\text{ratio}}$ ) were monitored for selected residues of L1 A $\beta$ <sub>40</sub> as a function of increasing anle138b molar ratios (SMPR 1:0 to 1:1.2) under post-treatment conditions. The gray curves represent normalized intensities of original peaks ( $I_{\text{free}}$ ) observed at SMPR 1:0, and their changes upon ligand titration ( $I_{\text{bound}}$ ). The blue curves indicate new peaks indicative of slow exchange. The dashed red line marks the 0.6 intensity threshold used as a reference for qualitative comparison.  $I_{\text{ratio}} = I_{\text{bound}} / I_{\text{free}}$ , where  $I_{\text{free}}$  refers to the peak intensity in the absence of anle138b, and  $I_{\text{bound}}$  refers to the intensity at each titration point.

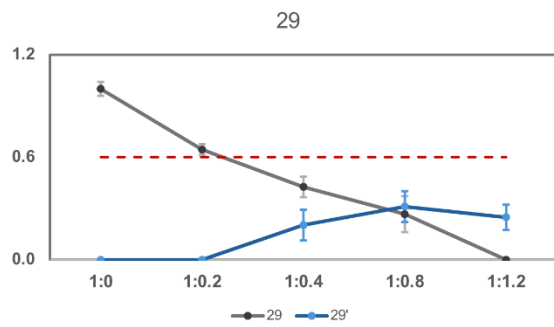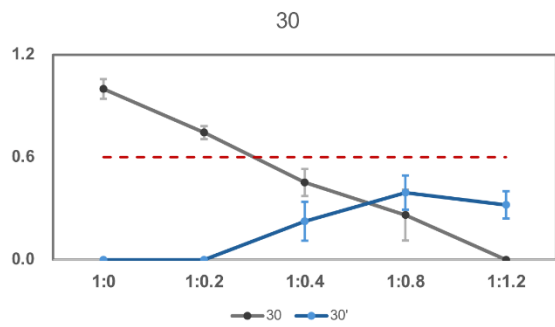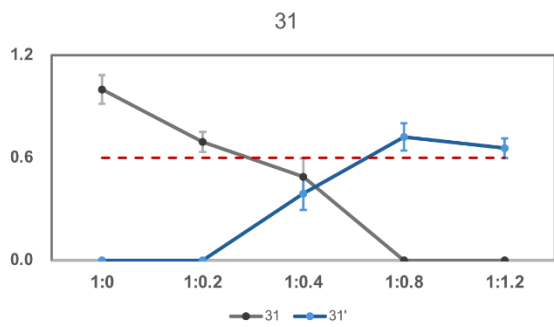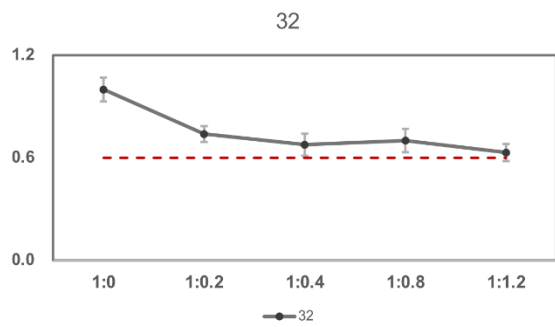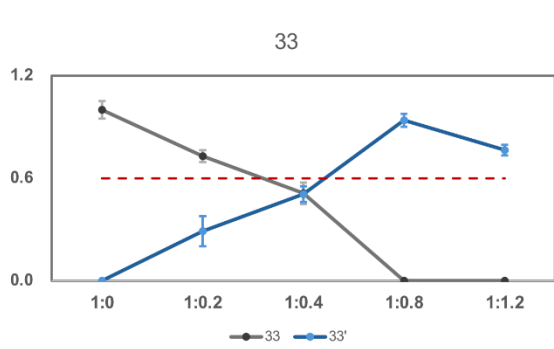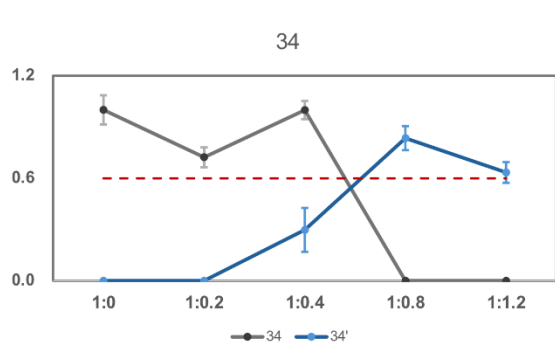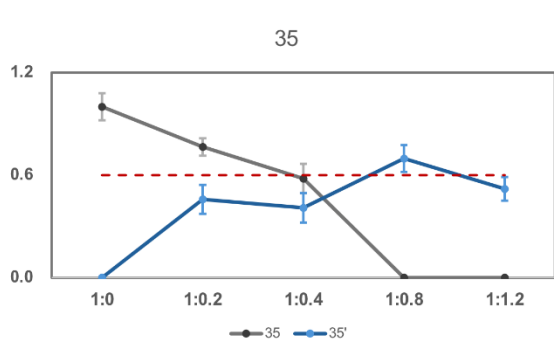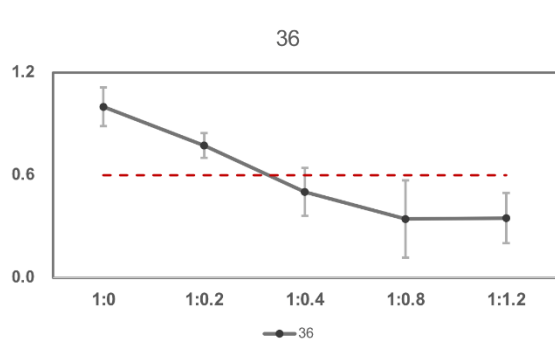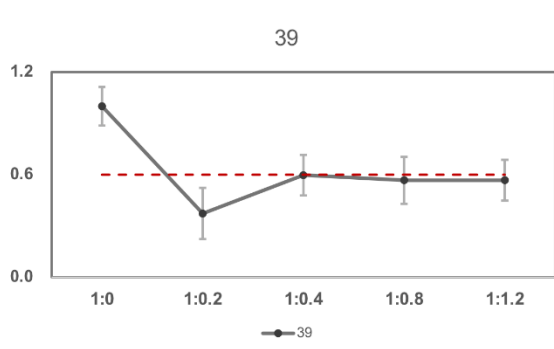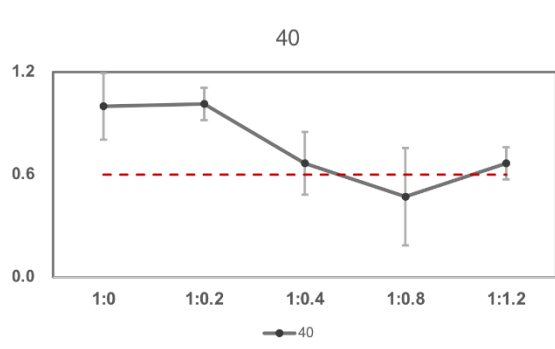



**Supplementary Figure 13 | Titration-dependent intensity changes indicating slow exchange binding of anle138b to residues 29–40 of L1 A $\beta$ <sub>40</sub> fibrils.**

Signal intensity ratios ( $I_{\text{ratio}}$ ) were monitored for selected residues of L1 A $\beta$ <sub>40</sub> as a function of increasing anle138b molar ratios (SMPR 1:0 to 1:1.2) under post-treatment conditions. The gray curves represent normalized intensities of original peaks ( $I_{\text{free}}$ ) observed at SMPR 1:0, and their changes upon ligand titration ( $I_{\text{bound}}$ ). The blue curves indicate new peaks indicative of slow exchange. The dashed red line marks the 0.6 intensity threshold used as a reference for qualitative comparison.  $I_{\text{ratio}} = I_{\text{bound}} / I_{\text{free}}$ , where  $I_{\text{free}}$  refers to the peak intensity in the absence of anle138b, and  $I_{\text{bound}}$  refers to the intensity at each titration point.

**a**

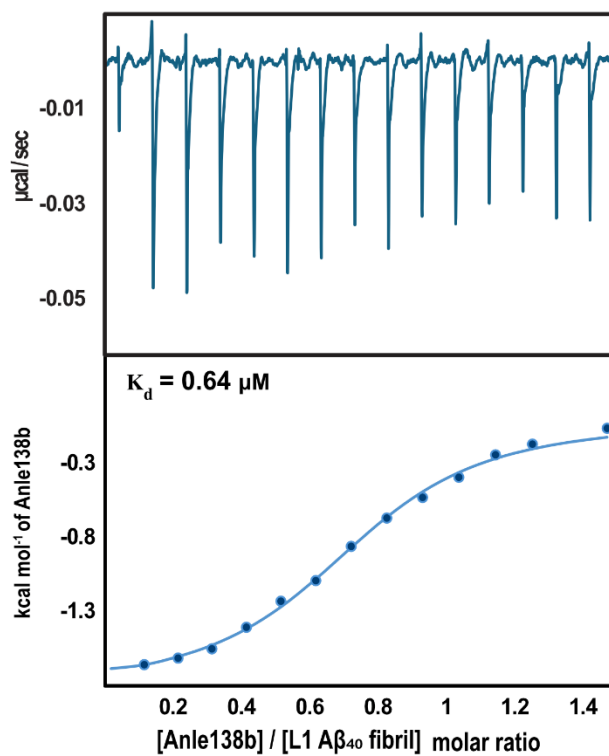

**b**

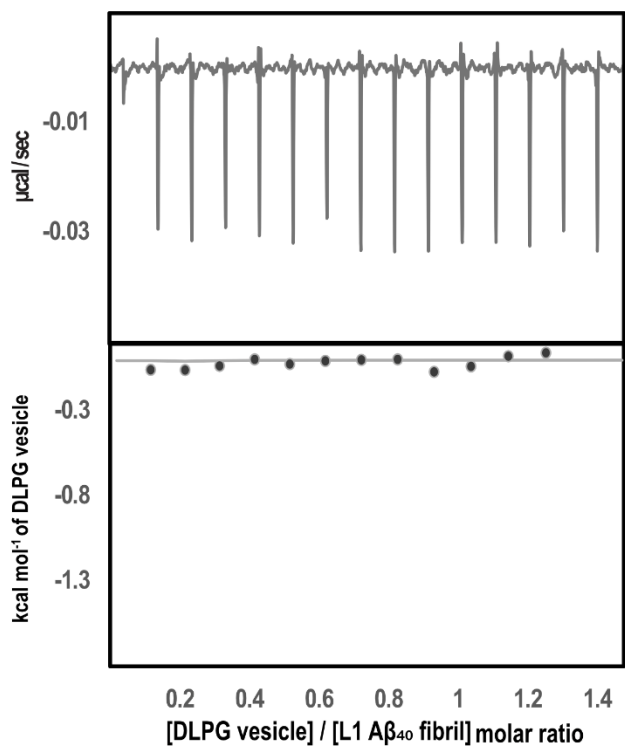

**Supplementary Figure 14 | ITC analysis of anle138b and DLPG vesicle binding to L1 A $\beta_{40}$  fibrils.**

The thermodynamic parameters for binding interaction are summarized in Tab. 2.

**a.** Isothermal titration calorimetry (ITC) thermogram (top) and integrated binding isotherm (bottom) of anle138b (100  $\mu$ M), formulated in DLPG vesicles (2 mM), titrated into L1 A $\beta_{40}$  fibrils (10  $\mu$ M). The fitted curve yields a dissociation constant ( $K_d$ ) of 0.64  $\mu$ M and a binding stoichiometry of  $\sim 0.72$  anle138b molecules per A $\beta_{40}$  monomer. **b.** Negative control: Titration of DLPG vesicles (2 mM) into L1 A $\beta_{40}$  fibrils (10  $\mu$ M) produces negligible heat and a flat isotherm, indicating no detectable interaction between vesicles and fibrils.

**a**

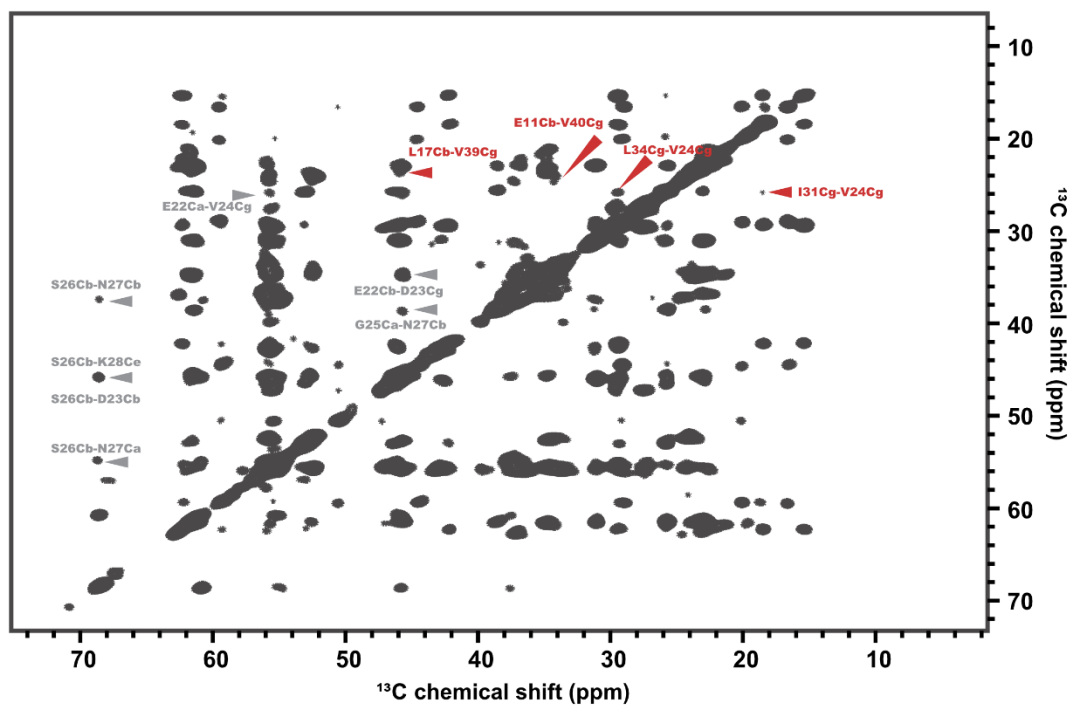

**b**

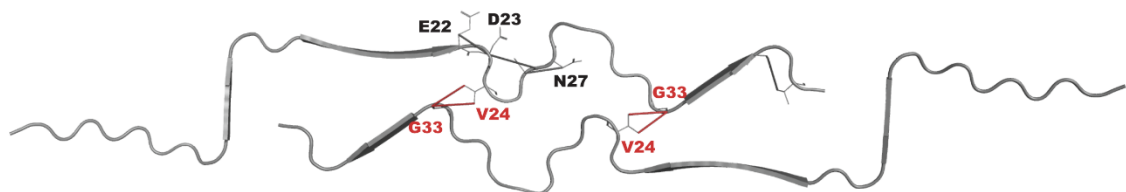

**c**

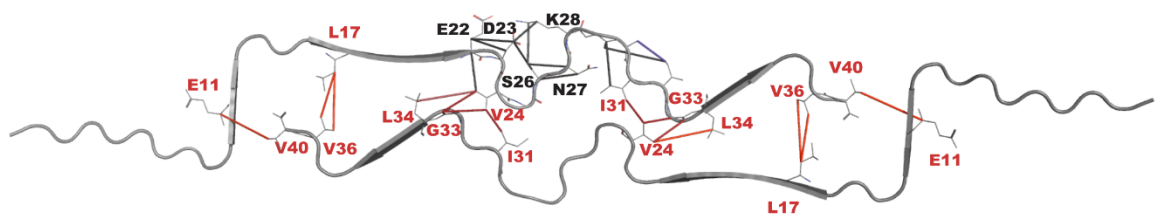

172 **Supplementary Figure 15 | 2D  $^{13}\text{C}$ - $^{13}\text{C}$ -DARR spectrum (265K, 850MHz) of L1 A $\beta_{40}$**   
173 **fibrils.**

174 **a.** Aliphatic region of the 2D  $^{13}\text{C}$ - $^{13}\text{C}$  chemical shift correlation spectrum acquired at 265 K  
175 and 850 MHz (mixing time = 200 ms). Gray arrows indicate medium-range intramolecular  
176 cross-peaks (2–4 Å); red arrows indicate medium-to-long-range intermolecular cross-peaks (3–  
177 5 Å). **b.** The structural model of L1 A $\beta_{40}$  fibrils shows the intramolecular contacts (gray bars,  
178 mixing time = 50 ms). **c.** The same structural model highlights the intra- and intermolecular  
179 contacts (gray and red bars, respectively, mixing time = 200 ms).

**a**

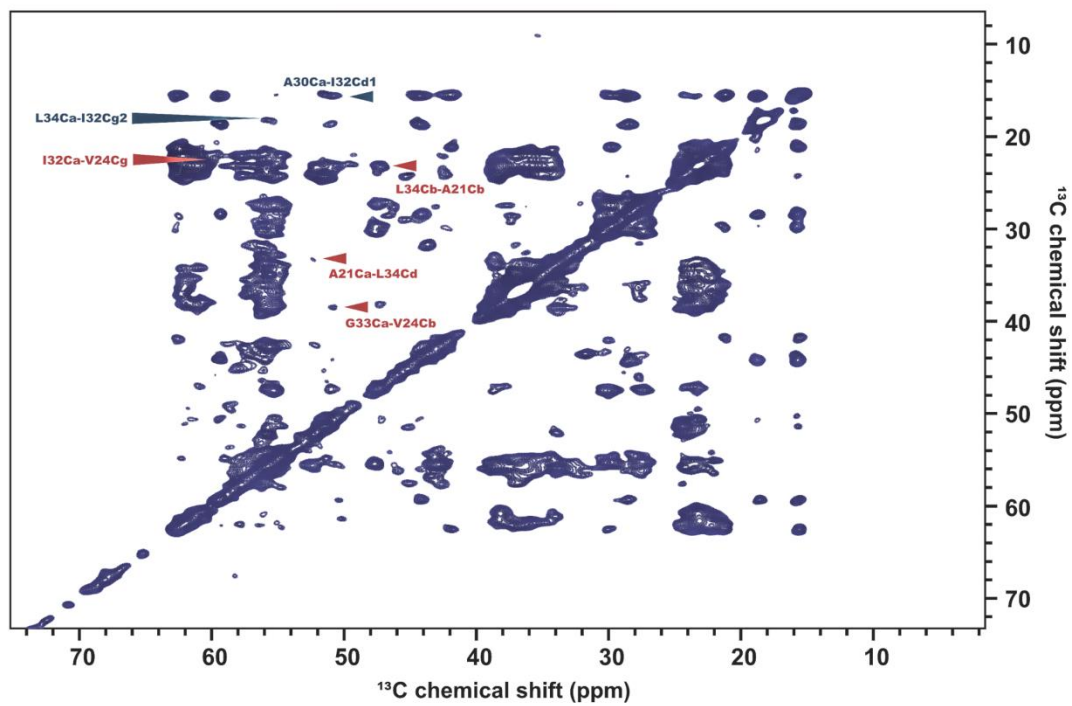

**b**

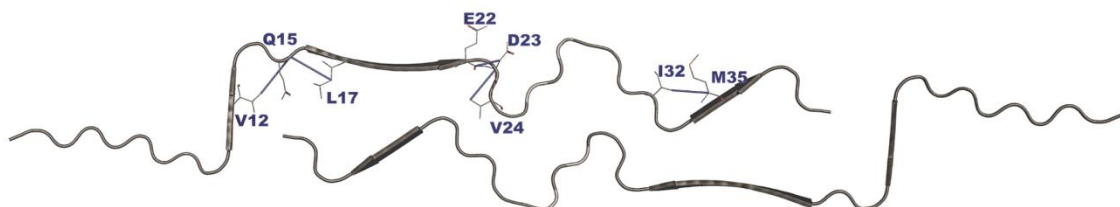

**c**

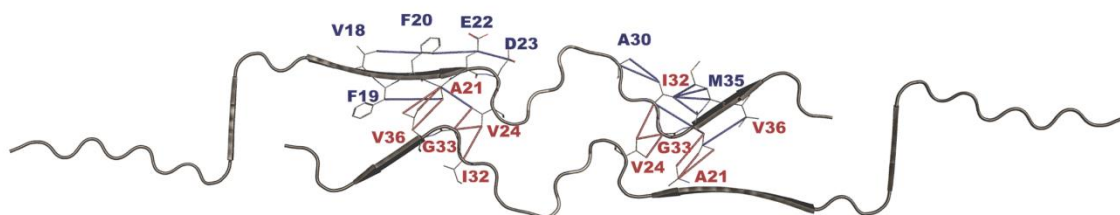

**Supplementary Figure 16 | 2D  $^{13}\text{C}$ - $^{13}\text{C}$ -DARR spectrum (265K, 850MHz) of L1 A $\beta_{40}$  fibrils (post-treatment condition).**

Anle138b was applied to L1 A $\beta_{40}$  fibrils after fibril formation (A $\beta_{40}$ : anle138b (SMPR) = 1:1.2). **a.** Aliphatic region of the 2D  $^{13}\text{C}$ - $^{13}\text{C}$  chemical shift correlation spectrum acquired at 265 K and 850 MHz (mixing time = 200 ms). Blue arrows indicate medium-range intramolecular cross-peaks (2–4 Å); red arrows indicate medium-to-long-range intermolecular cross-peaks (3–5 Å). **b.** The structural model of L1 A $\beta_{40}$  fibrils shows the intramolecular contacts (blue bars, mixing time = 50 ms). **c.** The same structural model highlights the intra- and intermolecular contacts (blue and red bars, respectively, mixing time = 200 ms).

**a**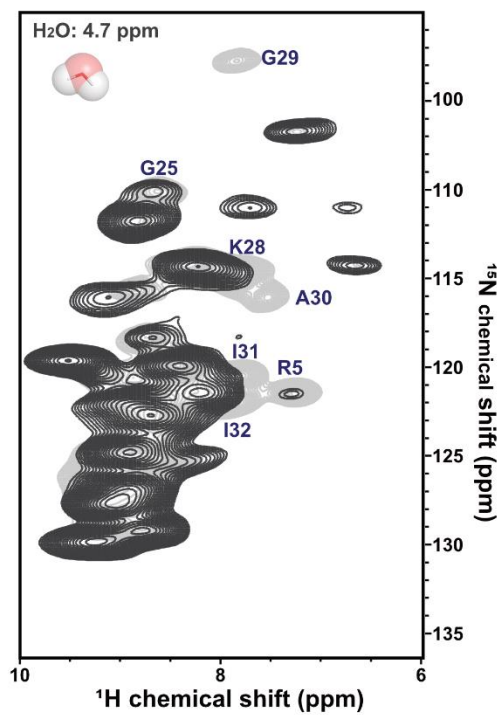**b**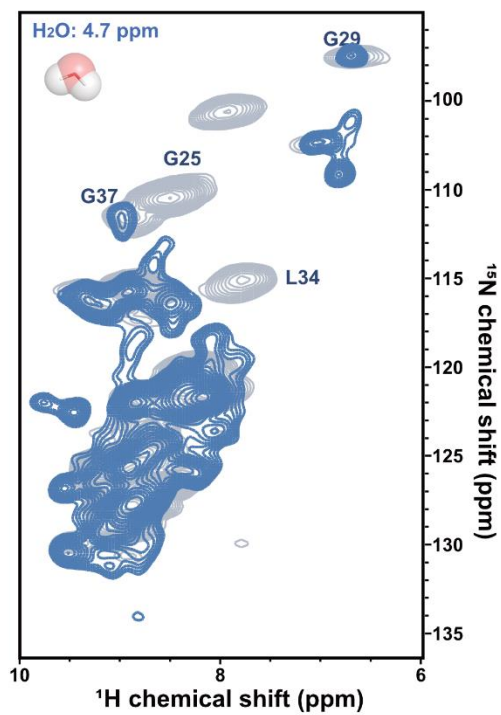**c**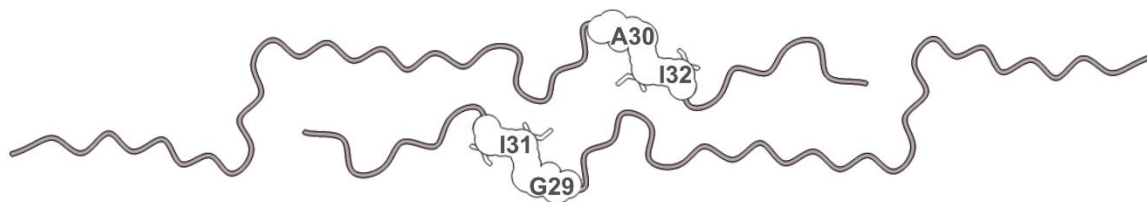**d**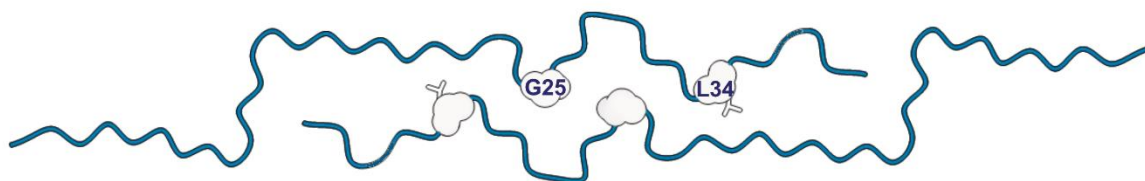



**Supplementary Figure 17 | Comparison of H<sub>2</sub>O-accessible amide groups in L1 A $\beta$ <sub>40</sub> fibrils under control and post-treatment conditions.**

**a.** Light gray: 2D (H)NH spectrum of <sup>2</sup>H, <sup>13</sup>C, <sup>15</sup>N-labeled L1 A $\beta$ <sub>40</sub> fibrils (control). Dark gray: 2D plane at 4.7 ppm (water signal) in the H dimension was extracted from a 3D H(H)NH NOE spectrum with a 50 ms mixing time. Cross-peaks in dark gray indicate amide groups in close contact with H<sub>2</sub>O under control conditions. **b.** Light gray: 2D (H)NH spectrum of <sup>2</sup>H, <sup>13</sup>C, <sup>15</sup>N-labeled L1 A $\beta$ <sub>40</sub> fibrils under post-treatment conditions. Blue: 2D slice from a 3D H(H)NH NOE spectrum (50 ms mixing) at 4.7 ppm. Blue cross-peaks indicate water-accessible amides in the post-treatment condition. **c.** Structural map of control fibrils, with gray-colored residues indicating H<sub>2</sub>O-accessible amides. **d.** Structural map of post-treatment fibrils, with blue-colored residues indicating water-accessible amides. Residues with no detectable water contact are shown as white spheres.

**a**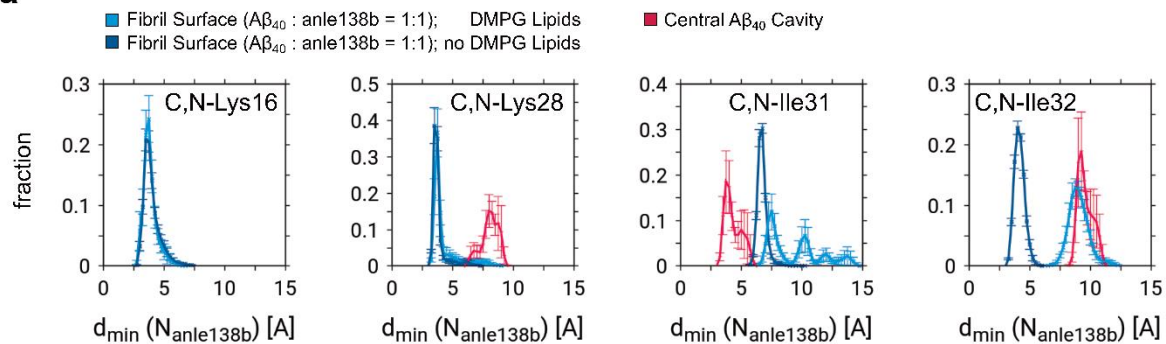**b**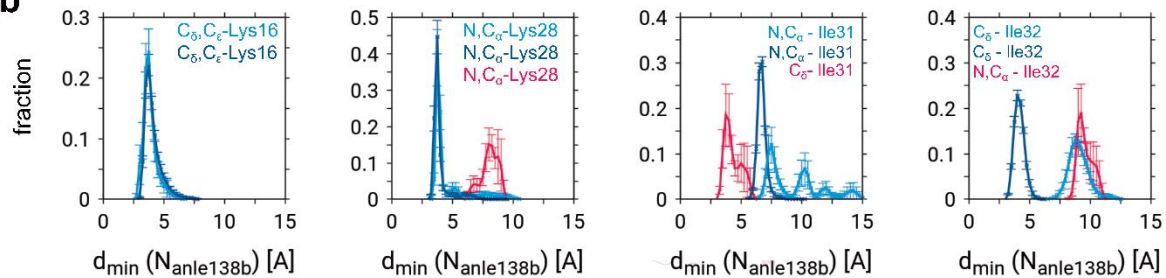**c** $A\beta_{40}$  L1 Fibril Surface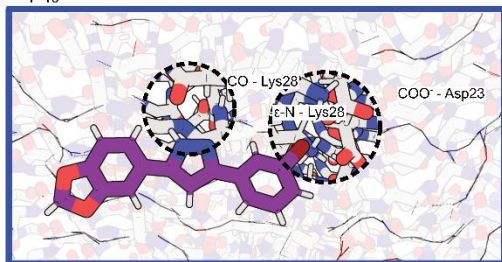 $A\beta_{40}$  L1 Central Cavity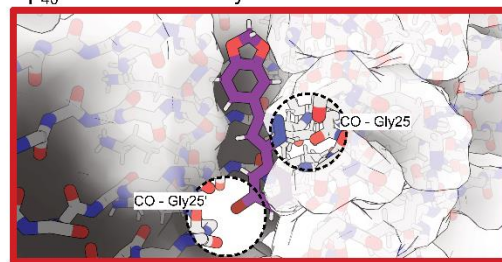

204 **Supplementary Figure 18 | Dominant binding poses and interatomic contacts of surface-**  
205 **bound and internally bound anle138b.**

206 **a.** Distributions of minimum distances derived from all N or C atoms of residues K16, K28,  
207 I31, and I32 to anle138b pyrazole nitrogen atoms for the simulation sets representing either  
208 surface-bound (blue and dark blue: without DMPG) or internally bound (red) anle138b. **b.**  
209 Distributions of minimum distances derived from the individual N and/or C atoms of residues  
210 K16, K28, I31, and I32 to anle138b pyrazole nitrogen atoms that best fit the distributions in **a**  
211 and **c.** Representative MD simulation snapshot of anle138b binding poses and interatomic  
212 contacts as observed for L1 A $\beta$ <sub>40</sub> surface-bound (left panel) or internally bound (right panel).  
213 Circles highlight interatomic contacts: Lys28 carbonyl to anle138b pyrazole and Asp23/Lys28  
214 side chain to anle138b bromophenyl interaction (left), as well as Gly25 carbonyl to anle138b  
215 pyrazole and Gly25 carbonyl (opposing protofilament) to anle138b bromophenyl interaction  
216 (right). DMPG lipids are not shown for clarity.

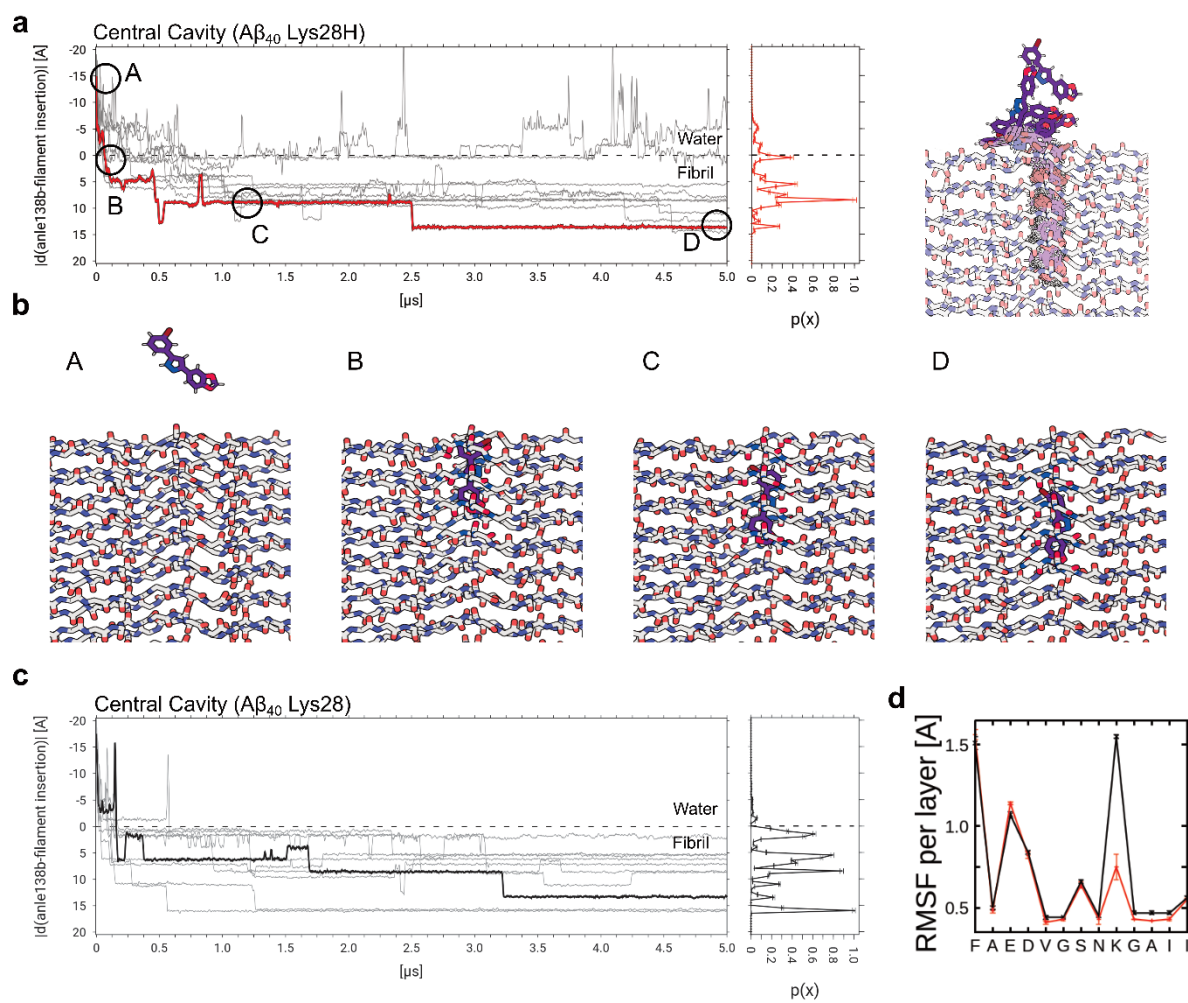

218 **Supplementary Figure 19 | Anle138b inserts spontaneously in the central cavity of A $\beta$ <sub>40</sub>**  
219 **L1 fibrils.**

220 **a.** Distance of the anle138b pyrazole nitrogen atoms to the fibril center-of-mass (representative  
221 trajectory as bold lines: color red; others as shaded thin lines for clarity: color gray) and **b.**  
222 snapshots (A, B, C, D) from MD simulations of anle138b spontaneously binding internally to  
223 the cavity of L1, as well as it's discrete translational motion along the fibril axis. **c.** Distance of  
224 the anle138b pyrazole nitrogen atoms to the fibril center-of-mass for simulations with  
225 deprotonated Lys28 i.e. disrupted hydrogen bond interaction between Asp23 and Lys28. The  
226 **histograms** (panels on the right) in **a** and **c** were calculated over the full trajectory length,  
227 respectively. Simulations in **a** show that deeper or comparable insertion to **c** does not occur on  
228 the multi  $\mu$ s-time scales accessible by the reported MD simulations. **d.** Average root mean  
229 squared fluctuations (RMSF) for residues of the loop region with (red) and without (black)  
230 intact Asp23-Lys28 hydrogen bond. Data are presented as mean values  $\pm$  SEM (depicted by  
231 error bars).

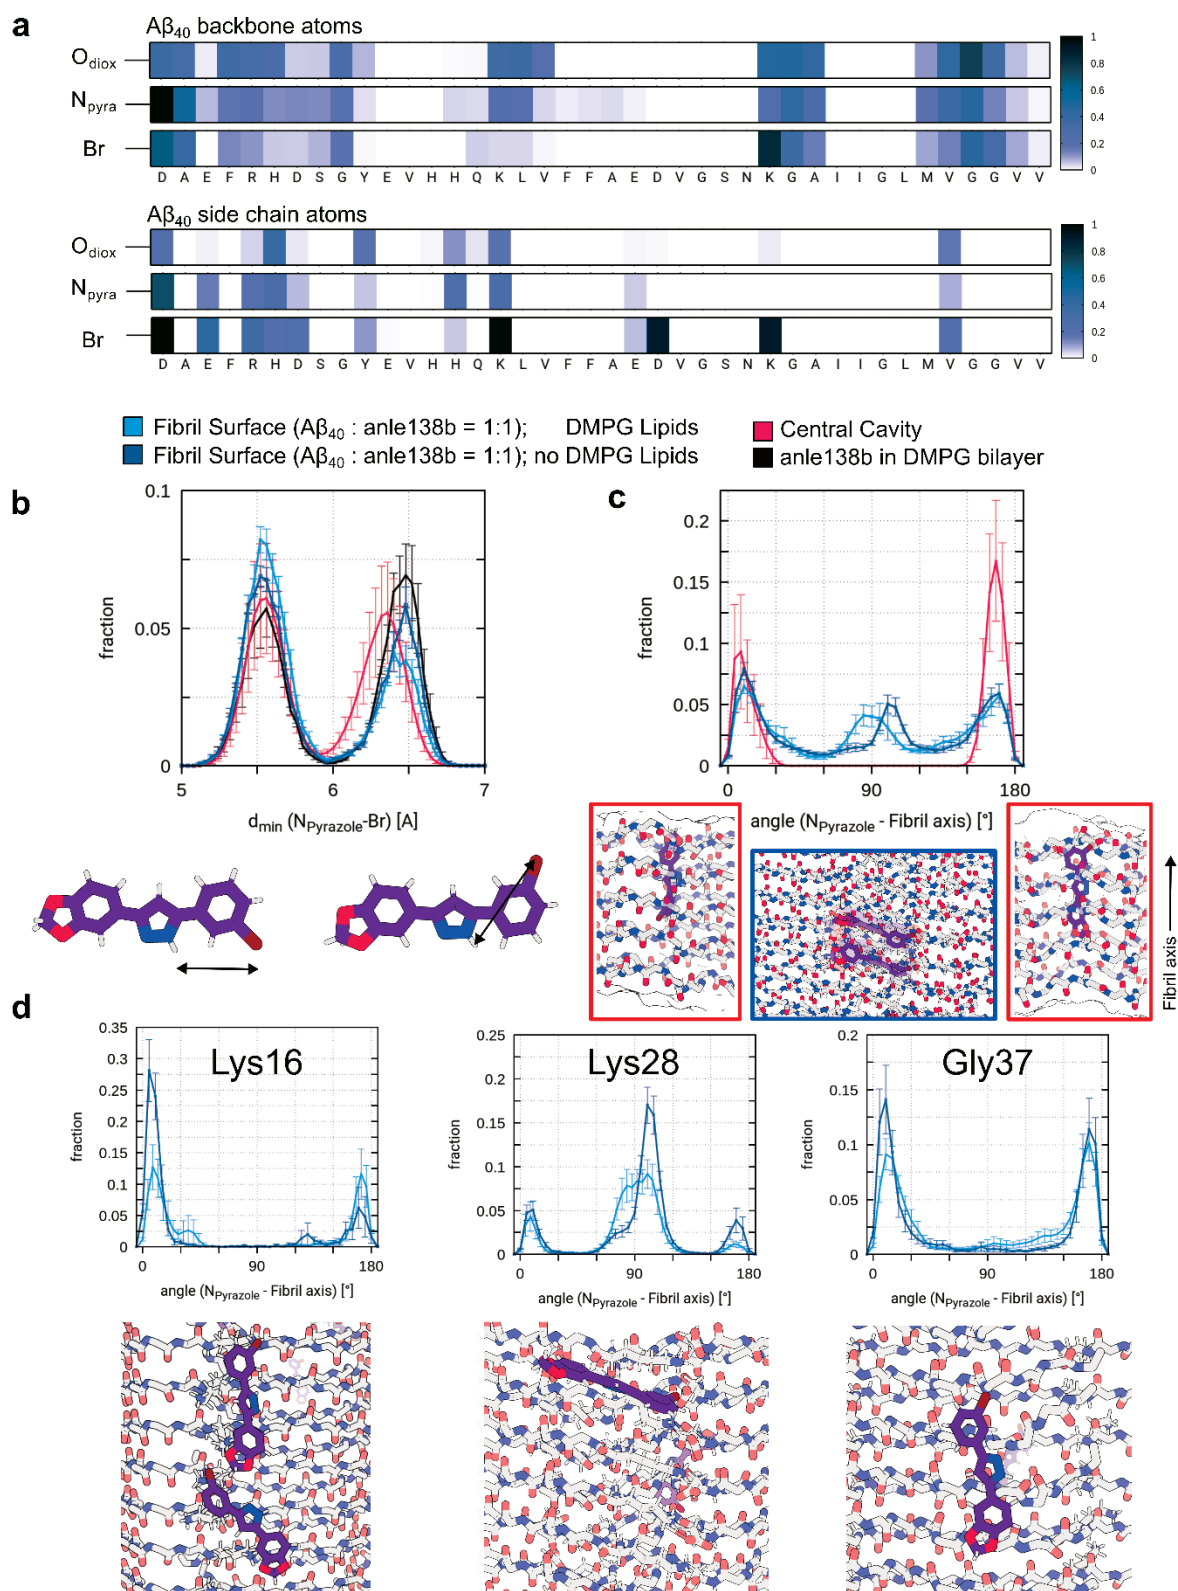

233 **Supplementary Figure 20 | Anle138b binding modes to the surface and central cavity of**  
234 **L1 A $\beta$ <sub>40</sub> fibrils.**

235 **a.** Heat maps report polar contacts between backbone and side chain atoms of individual L1  
236 A $\beta$ <sub>40</sub> fibril structure residues and polar moieties of anle138b, respectively. Scale bars indicate  
237 contact probabilities. **b.** Distance distribution of anle138b pyrazole N to Bromine atom (blue –  
238 surface-bound anle138b; red - internal binding pose, black – anle138b in DMPG bilayer). **c.**  
239 Anle138b alignment with respect to the fibril axis when bound either internally to the loop  
240 region (red) or to the surface of the L1 A $\beta$ <sub>40</sub> fibrils (blue). **d.** Anle138b alignment with respect  
241 to the fibril axis when bound to residues Lys16, Lys28, and Gly37 of the L1 A $\beta$ <sub>40</sub> fibril surface.  
242 Representative snapshots of anle138b binding poses are shown. DMPG lipids are not depicted  
243 for clarity.

244 **Supplementary Table 1 | Experimental parameters of NMR data acquisition on the sample.**

| Exp            | Spectrometer     | MAS (kHz)<br>rotor | Transfer                              | Nucleus         | time cp (ms) | rf (kHz) | Ramp    | Temperature | Sample                                                                                                                                                                                                          |
|----------------|------------------|--------------------|---------------------------------------|-----------------|--------------|----------|---------|-------------|-----------------------------------------------------------------------------------------------------------------------------------------------------------------------------------------------------------------|
| 3D (H)CANH     | 800, Advance III | 55 (1.3mm)         | $^1\text{H}$ - $^{13}\text{C}$ -CP    | $^1\text{H}$    | 6.5          | 96       | 80-100% | 235K        | $^2\text{H}$ , $^{13}\text{C}$ , $^{15}\text{N}$ A $\beta_{40}$ fibril:<br><br>$^2\text{H}$ , $^{13}\text{C}$ , $^{15}\text{N}$ A $\beta_{40}$ fibril:<br>Anle138b = 1:0.2, 1: 0.4,<br>1:0.8, 1:1.2 (titration) |
|                |                  |                    |                                       | $^{13}\text{C}$ |              | 88       | square  |             |                                                                                                                                                                                                                 |
|                |                  |                    | $^{13}\text{C}$ - $^{15}\text{N}$ -CP | $^{13}\text{C}$ | 20           | 139.1    | tangent |             |                                                                                                                                                                                                                 |
|                |                  |                    |                                       | $^{15}\text{N}$ |              | 57       | square  |             |                                                                                                                                                                                                                 |
|                |                  |                    | $^{15}\text{N}$ - $^1\text{H}$ -CP    | $^1\text{H}$    |              | 145      | 100-80% |             |                                                                                                                                                                                                                 |
|                |                  |                    |                                       | $^{15}\text{N}$ | 0.7          | 85       |         |             |                                                                                                                                                                                                                 |
| 3D (H)coCAcoNH | 800, Advance III | 55 (1.3mm)         | $^1\text{H}$ - $^{13}\text{C}$ -CP    | $^1\text{H}$    | 2.9          | 22       | 85-100% | 235K        | $^2\text{H}$ , $^{13}\text{C}$ , $^{15}\text{N}$ A $\beta_{40}$ fibril:<br><br>Anle138b = 1:1.2                                                                                                                 |
|                |                  |                    |                                       | $^{13}\text{C}$ |              | 17       | square  |             |                                                                                                                                                                                                                 |
|                |                  |                    | $^{13}\text{C}$ - $^{15}\text{N}$ -CP | $^{13}\text{C}$ | 25           | 17       | tangent |             |                                                                                                                                                                                                                 |
|                |                  |                    |                                       | $^{15}\text{N}$ |              | 15       | square  |             |                                                                                                                                                                                                                 |
|                |                  |                    | $^{15}\text{N}$ - $^1\text{H}$ -CP    | $^1\text{H}$    | 8            | 24       | 100-80% |             |                                                                                                                                                                                                                 |
|                |                  |                    |                                       | $^{15}\text{N}$ | 0.85         | 20.7     |         |             |                                                                                                                                                                                                                 |
| 2D (H)NH       | 800, Advance III | 55 (1.3mm)         | $^{15}\text{N}$ - $^1\text{H}$ -CP    | $^1\text{H}$    | 3.1          | 97       | 100-80% | 235K        | $^2\text{H}$ , $^{13}\text{C}$ , $^{15}\text{N}$ A $\beta_{40}$ fibril:<br><br>Anle138b = 1:1.2                                                                                                                 |
|                |                  |                    |                                       | $^{15}\text{N}$ |              | 170      |         |             |                                                                                                                                                                                                                 |
|                |                  |                    | $^1\text{H}$ - $^{15}\text{N}$ -CP    | $^1\text{H}$    | 0.9          | 104      | 80-100% |             |                                                                                                                                                                                                                 |
|                |                  |                    |                                       | $^{15}\text{N}$ |              | 170      |         |             |                                                                                                                                                                                                                 |
| 3D H(H)NH NOE  | 800, Advance III | 55 (1.3mm)         | $^{15}\text{N}$ - $^1\text{H}$ -CP    | $^1\text{H}$    | 3.1          | 90       | 100-80% | 235K        | $^2\text{H}$ , $^{13}\text{C}$ , $^{15}\text{N}$ A $\beta_{40}$ fibril:<br><br>Anle138b = 1:1.2                                                                                                                 |
|                |                  |                    |                                       | $^{15}\text{N}$ |              | 152      |         |             |                                                                                                                                                                                                                 |
|                |                  |                    | $^1\text{H}$ - $^{15}\text{N}$ -CP    | $^1\text{H}$    | 0.9          | 99       | 80-100% |             |                                                                                                                                                                                                                 |



|                                                                             |          |            |                                       |                 |     |      |         |      |                                                                                                                                                                                                                                                                                                                                         |
|-----------------------------------------------------------------------------|----------|------------|---------------------------------------|-----------------|-----|------|---------|------|-----------------------------------------------------------------------------------------------------------------------------------------------------------------------------------------------------------------------------------------------------------------------------------------------------------------------------------------|
|                                                                             |          |            |                                       | $^{15}\text{N}$ |     | 166  |         |      |                                                                                                                                                                                                                                                                                                                                         |
| 2D $^{13}\text{C}$ - $^{13}\text{C}$ -DARR<br>(20ms, 50ms, 200ms,<br>400ms) | 850, NEO | 17 (3.2mm) | $^1\text{H}$ - $^{13}\text{C}$ -CP    | $^1\text{H}$    |     | 80   | 100-80% | 265K | $^1\text{H}$ , $^{13}\text{C}$ , $^{15}\text{N}$ A $\beta_{40}$ fibril<br><br>$^1\text{H}$ , $^{13}\text{C}$ , $^{15}\text{N}$ A $\beta_{40}$ fibril:<br>Anle138b = 1:1.2<br>(Post-treatment condition)<br><br>$^1\text{H}$ , $^{13}\text{C}$ , $^{15}\text{N}$ A $\beta_{40}$ fibril:<br>Anle138b = 1:1.2<br>(Pre-treatment condition) |
|                                                                             |          |            |                                       | $^{13}\text{C}$ | 1.1 | 88   |         |      |                                                                                                                                                                                                                                                                                                                                         |
| 3D (H)CANH                                                                  | 850, NEO | 55 (1.3mm) | $^1\text{H}$ - $^{13}\text{C}$ -CP    | $^1\text{H}$    | 2.9 | 22   | 85-100% | 235K | $^1\text{H}$ , $^{13}\text{C}$ , $^{15}\text{N}$ A $\beta_{40}$ fibril                                                                                                                                                                                                                                                                  |
|                                                                             |          |            |                                       | $^{13}\text{C}$ |     | 17   | square  |      |                                                                                                                                                                                                                                                                                                                                         |
|                                                                             |          |            | $^{13}\text{C}$ - $^{15}\text{N}$ -CP | $^{13}\text{C}$ | 25  | 17   | tangent |      |                                                                                                                                                                                                                                                                                                                                         |
|                                                                             |          |            |                                       | $^{15}\text{N}$ |     | 15   | square  |      |                                                                                                                                                                                                                                                                                                                                         |
|                                                                             |          |            | $^{15}\text{N}$ - $^1\text{H}$ -CP    | $^1\text{H}$    |     | 24   | 100-80% |      |                                                                                                                                                                                                                                                                                                                                         |
|                                                                             |          |            |                                       | $^{15}\text{N}$ | 0.8 | 20.7 |         |      |                                                                                                                                                                                                                                                                                                                                         |
| 2D (H)NCA                                                                   | 850, NEO | 17 (3.2mm) | $^{13}\text{C}$ - $^{15}\text{N}$ -CP | $^{13}\text{C}$ | 3   | 16   | 100-90% | 265K | $^1\text{H}$ , $^{13}\text{C}$ , $^{15}\text{N}$ A $\beta_{40}$ fibril<br><br>$^1\text{H}$ , $^{13}\text{C}$ , $^{15}\text{N}$ A $\beta_{40}$ fibril:<br>Anle138b = 1:1.2<br>(Pre-treatment condition)<br><br>$^1\text{H}$ , $^{13}\text{C}$ , $^{15}\text{N}$ A $\beta_{40}$ fibril:<br>Anle138b = 1:1.2<br>(Pre-treatment condition)  |
|                                                                             |          |            |                                       | $^{15}\text{N}$ |     | 18   |         |      |                                                                                                                                                                                                                                                                                                                                         |
|                                                                             |          |            | $^1\text{H}$ - $^{15}\text{N}$ -CP    | $^1\text{H}$    | 1.5 | 83   | 80-100% |      |                                                                                                                                                                                                                                                                                                                                         |
|                                                                             |          |            |                                       | $^{15}\text{N}$ |     | 73   |         |      |                                                                                                                                                                                                                                                                                                                                         |

|                                                       |                                             |            |                                    |                 |     |      |         |            |                                                                                                                |
|-------------------------------------------------------|---------------------------------------------|------------|------------------------------------|-----------------|-----|------|---------|------------|----------------------------------------------------------------------------------------------------------------|
| 2D $^{13}\text{C}$ - $^{13}\text{C}$ -DARR<br>(20ms)  | 850, NEO                                    | 17 (3.2mm) | $^1\text{H}$ - $^{13}\text{C}$ -CP | $^1\text{H}$    |     | 80   | 100-80% | 265K       | ILE $^{13}\text{C}$ , $^{15}\text{N}$ A $\beta_{40}$ fibril                                                    |
|                                                       |                                             |            |                                    | $^{13}\text{C}$ | 1.5 | 88   |         |            | ILE $^{13}\text{C}$ , $^{15}\text{N}$ A $\beta_{40}$ fibril:<br>Anle138b = 1:1.2<br>(Post-treatment condition) |
| 2D $^{13}\text{C}$ - $^{13}\text{C}$ -DARR<br>(20ms)  | 850, NEO                                    | 17 (3.2mm) | $^1\text{H}$ - $^{13}\text{C}$ -CP | $^1\text{H}$    |     | 80   | 100-80% | 265K       | ILE $^{13}\text{C}$ , $^{15}\text{N}$ A $\beta_{40}$ fibril:<br>Anle138b = 1:1.2<br>(Pre-treatment condition)  |
|                                                       |                                             |            |                                    | $^{13}\text{C}$ | 1.2 | 88   |         |            | LYS $^{13}\text{C}$ , $^{15}\text{N}$ A $\beta_{40}$ fibril:<br>Anle138b = 1:1.2<br>(Post -fibril condition)   |
| 2D $^{13}\text{C}$ - $^{13}\text{C}$ -RFDR<br>(2.6ms) | 600, Advance III<br>e = 6 ~8<br>TEMTRIPol-1 | 10 (3.2mm) | $^1\text{H}$ - $^{13}\text{C}$ -CP | $^1\text{H}$    |     | 98   | 90-100% | 100K (DNP) | LYS $^{13}\text{C}$ , $^{15}\text{N}$ A $\beta_{40}$ fibril:<br>Anle138b = 1:1.2<br>(Pre-treatment condition)  |
|                                                       |                                             |            |                                    | $^{13}\text{C}$ | 0.9 | 77   |         |            | ILE $^{13}\text{C}$ , $^{15}\text{N}$ A $\beta_{40}$ fibril:<br>Anle138b = 1:1.2<br>(Post-treatment condition) |
| 2D $^{13}\text{C}$ - $^{13}\text{C}$ -DARR<br>(50ms)  | 600, Advance III<br>e = 6 ~8<br>TEMTRIPol-1 | 10 (3.2mm) | $^1\text{H}$ - $^{13}\text{C}$ -CP | $^1\text{H}$    |     | 70.8 | 90-100% | 100K (DNP) | ILE $^{13}\text{C}$ , $^{15}\text{N}$ A $\beta_{40}$ fibril:<br>Anle138b = 1:1.2<br>(Post-treatment condition) |

|         |                                             |            |                                     |                 |      |    |         |            |                                                                                                                          |
|---------|---------------------------------------------|------------|-------------------------------------|-----------------|------|----|---------|------------|--------------------------------------------------------------------------------------------------------------------------|
|         |                                             |            |                                     | $^{13}\text{C}$ | 0.6  |    |         |            | LYS $^{13}\text{C}$ , $^{15}\text{N}$ A $\beta_{40}$ fibril:<br>Anle138b = 1:1.2<br>(Pre-treatment condition)            |
| 2D NHHc | 600, Advance III<br>e = 6 ~8<br>TEMTRIPol-1 | 10 (3.2mm) | $^1\text{H}$ - $^{15}\text{N}$ -CP  | $^1\text{H}$    | 0.35 | 49 | 90-100% | 100K (DNP) | $^1\text{H}$ , $^{13}\text{C}$ , $^{15}\text{N}$ A $\beta_{40}$ fibril:<br>Anle138b = 1:1.2<br>(Pre-treatment condition) |
|         |                                             |            |                                     | $^{15}\text{N}$ |      | 32 |         |            |                                                                                                                          |
|         |                                             |            | $^{15}\text{N}$ - $^1\text{H}$ --CP | $^{15}\text{N}$ |      | 32 |         |            | $^1\text{H}$ , $^{13}\text{C}$ , $^{15}\text{N}$ A $\beta_{40}$ fibril:<br>Anle138b = 1:1.2<br>(Pre-treatment condition) |
|         |                                             |            |                                     | $^1\text{H}$    | 0.35 | 49 | 80-100% |            |                                                                                                                          |
|         |                                             |            | $^1\text{H}$ - $^{13}\text{C}$ -CP  | $^1\text{H}$    |      | 61 | 80-100% |            |                                                                                                                          |
|         |                                             |            |                                     | $^{13}\text{C}$ | 0.6  | 84 |         |            |                                                                                                                          |
| 2D NHHc | 600, Advance III<br>e = 6 ~8<br>TEMTRIPol-1 | 10 (3.2mm) | $^1\text{H}$ - $^{15}\text{N}$ -CP  | $^1\text{H}$    | 0.36 | 39 | 90-100% | 100K (DNP) | LYS $^{13}\text{C}$ , $^{15}\text{N}$ A $\beta_{40}$ fibril:<br>Anle138b = 1:1.2<br>(Post-treatment condition)           |
|         |                                             |            |                                     | $^{15}\text{N}$ |      | 31 |         |            |                                                                                                                          |
|         |                                             |            | $^{15}\text{N}$ - $^1\text{H}$ --CP | $^{15}\text{N}$ |      | 31 |         |            | LYS $^{13}\text{C}$ , $^{15}\text{N}$ A $\beta_{40}$ fibril:<br>Anle138b = 1:1.2<br>(Pre-treatment condition)            |
|         |                                             |            |                                     | $^1\text{H}$    | 0.6  | 39 | 80-100% |            |                                                                                                                          |
|         |                                             |            | $^1\text{H}$ - $^{13}\text{C}$ -CP  | $^1\text{H}$    |      | 67 | 80-100% |            |                                                                                                                          |
|         |                                             |            |                                     | $^{13}\text{C}$ | 0.7  | 61 |         |            |                                                                                                                          |
| 2D NHHc | 600, Advance III<br>e = 6 ~8<br>TEMTRIPol-1 | 10 (3.2mm) | $^1\text{H}$ - $^{15}\text{N}$ -CP  | $^1\text{H}$    | 0.5  | 43 | 90-100% | 100K (DNP) | ILE $^{13}\text{C}$ , $^{15}\text{N}$ A $\beta_{40}$ fibril:<br>Anle138b = 1:1.2<br>(Post-treatment condition)           |
|         |                                             |            |                                     | $^{15}\text{N}$ |      | 33 |         |            |                                                                                                                          |
|         |                                             |            | $^{15}\text{N}$ - $^1\text{H}$ --CP | $^{15}\text{N}$ |      | 33 |         |            | ILE $^{13}\text{C}$ , $^{15}\text{N}$ A $\beta_{40}$ fibril:<br>Anle138b = 1:1.2<br>(Pre-treatment fibril condition)     |
|         |                                             |            |                                     | $^1\text{H}$    | 0.3  | 43 | 80-100% |            |                                                                                                                          |
|         |                                             |            | $^1\text{H}$ - $^{13}\text{C}$ -CP  | $^1\text{H}$    |      | 98 | 80-100% |            |                                                                                                                          |
|         |                                             |            |                                     | $^{13}\text{C}$ | 0.7  | 77 |         |            |                                                                                                                          |

246 **Supplementary Table 2 | Thermodynamic parameters obtained from ITC titrations of anle138b (in DLPG vesicle) or DLPG vesicle**  
247 **alone into L1 A $\beta$ <sub>40</sub> fibrils.**

248 Control titration results using DLPG vesicles without anle138b are shown in Supplementary Fig. 14 b, while titrations with DLPG vesicles  
249 containing anle138b are shown in Fig. 4 b and Supplementary Fig. 14a.

250

|                          | [Anle138b (DLPG vesicle)] / [L1 A $\beta$ <sub>40</sub> fibril] | [DLPG vesicle] / [L1 A $\beta$ <sub>40</sub> fibril] |
|--------------------------|-----------------------------------------------------------------|------------------------------------------------------|
| [Cell] ( $\mu$ M)        | 10.00                                                           | 10.00                                                |
| [Syringe] ( $\mu$ M)     | 100.00                                                          | 100.00                                               |
| N (sites)                | $0.72 \pm 0.01$                                                 |                                                      |
| KD ( $\mu$ M)            | $0.64 \pm 0.068$                                                |                                                      |
| $\Delta$ H (kcal/mol)    | $-1.84 \pm 0.039$                                               |                                                      |
| $\Delta$ G (kcal/mol)    | -8.45                                                           |                                                      |
| -T $\Delta$ S (kcal/mol) | -6.62                                                           |                                                      |

251

252    **Supplementary Table 3 | Cryo-EM structure determination statistics.**

|                                                   | Post-treatment Aβ <sub>40</sub> fibril              | Pre-treatment Aβ <sub>40</sub> fibril               |
|---------------------------------------------------|-----------------------------------------------------|-----------------------------------------------------|
| <b>Data collection</b>                            |                                                     |                                                     |
| Microscope                                        | Titan Krios G2                                      | Titan Krios G2                                      |
| Voltage [keV]                                     | 300                                                 | 300                                                 |
| Detector                                          | K3                                                  | K3                                                  |
| Magnification                                     | 81,000                                              | 81,000                                              |
| Pixel size [Å]                                    | 1.05                                                | 1.05                                                |
| Defocus range [μm]                                | -0.7 to -2.4                                        | -0.7 to -2.4                                        |
| Exposure time [s/frame]                           | 3.0                                                 | 2.95                                                |
| Number of frames                                  | 40                                                  | 40                                                  |
| Total dose [e <sup>-</sup> /Å <sup>2</sup> ]      | ~40<br>(~1.0 e <sup>-</sup> /Å <sup>2</sup> /frame) | ~40<br>(~1.0 e <sup>-</sup> /Å <sup>2</sup> /frame) |
| <b>Reconstruction</b>                             |                                                     |                                                     |
| Micrographs                                       | 7,311                                               | 21,576                                              |
| Box width [pixels]                                | 250                                                 | 250                                                 |
| Inter-box distance [pixels]                       | 13                                                  | 13                                                  |
| Picked segments (no.)                             | 3,193,361                                           | 9,147,664                                           |
| <b>Final map<sup>a</sup></b>                      |                                                     |                                                     |
| Final segments [no.]                              | 326,836                                             | 888,252                                             |
| Final resolution [Å] (FSC=0.143)                  | 2.79                                                | 2.76                                                |
| Applied map sharpening B-factor [Å <sup>2</sup> ] | -114                                                | -121                                                |
| Symmetry imposed                                  | C1                                                  | C1                                                  |
| Helical rise [Å]                                  | 2.35                                                | 2.35                                                |
| Helical twist [°]                                 | 179.65                                              | 179.65                                              |

<sup>a</sup> Sharpened map and refined atomic model are provided as SI files.

254 **Supplementary Table 4 | Model building statistics.**

| Lipid-induced PM               | Post-treatment          | Pre-treatment           |
|--------------------------------|-------------------------|-------------------------|
|                                | Aβ <sub>40</sub> fibril | Aβ <sub>40</sub> fibril |
| Initial model [PDB code]       | 8ovk                    | 8ovk                    |
| Model composition <sup>a</sup> |                         |                         |
| Chains                         | 10                      | 10                      |
| Non-hydrogen atoms             | 3060                    | 3060                    |
| Protein residues               | 400                     | 400                     |
| RMS deviations                 |                         |                         |
| Bond lengths [Å]               | 0.02                    | 0.01                    |
| Bond angles [°]                | 2.23                    | 2.09                    |
| Validation                     |                         |                         |
| MolProbity score               | 1.68                    | 1.70                    |
| Clashscore                     | 5.86                    | 6.19                    |
| Ramachandran plot              |                         |                         |
| Outliers [%]                   | 0                       | 0                       |
| Allowed [%]                    | 5.26                    | 5.26                    |
| Favored [%]                    | 94.74                   | 94.74                   |

255 <sup>a</sup> Sharpened map and refined atomic model 1.
